# Supplementary material for: Proteochemometric model for predicting the inhibition of penicillin-binding proteins
Source: Springer Nature journal article supplement (doi:10.1007/s10822-014-9809-0), 2014-10-25
Supplement: 10822_2014_9809_MOESM1_ESM.pdf [file 10822_2014_9809_MOESM1_ESM.pdf]

Electronic Supplementary Materials

## **Proteochemometric Model for Predicting the Inhibition of Penicillin-Binding Proteins**

Sunanta Nabu<sup>1,2,5</sup>, Chanin Nantasenamat<sup>1,2\*</sup>, Wiwat Owasirikul<sup>1,3</sup>, Ratana Lawung<sup>2,4</sup>, Chartchalerm Isarankura-Na-Ayudhya<sup>2</sup>, Maris Lapins<sup>5</sup>, Jarl E. S. Wikberg<sup>5</sup>, Virapong Prachayasittikul<sup>2\*</sup>

<sup>1</sup> *Center of Data Mining and Biomedical Informatics, Faculty of Medical Technology, Mahidol University, Bangkok 10700, Thailand*

<sup>2</sup> *Department of Clinical Microbiology and Applied Technology, Faculty of Medical Technology, Mahidol University, Bangkok 10700, Thailand*

<sup>3</sup> *Department of Radiological Technology, Faculty of Medical Technology, Mahidol University, Bangkok 10700, Thailand*

<sup>4</sup> *Center of Medical Laboratory Service, Faculty of Medical Technology, Mahidol University, Bangkok 10700, Thailand*

<sup>5</sup> *Department of Pharmaceutical Biosciences, Uppsala University, Uppsala SE-751 24, Sweden*

### **\*Corresponding author information:**

C. Nantasenamat;

Address: Center of Data Mining and Biomedical Informatics, Faculty of Medical Technology, Mahidol University. Tel.: +66 2 441 4371; Fax: +66 2 441 4380.

E-mail address: chanin.nan@mahidol.ac.th

V. Prachayasittikul;

Address: Department of Clinical Microbiology and Applied Technology, Faculty of Medical Technology, Mahidol University. Tel: +66 2 441 4376; Fax: +66 2 441 4380.

E-mail: virapong.pra@mahidol.ac.th

**Table S1.** The data set used for construction of proteochemometric model of penicillin binding protein 2 of *N. gonorrhoeae*.

| Patterns | Penicillin                |           | Cefixime                             |           | Ceftriaxone                          |           |
|----------|---------------------------|-----------|--------------------------------------|-----------|--------------------------------------|-----------|
|          | MIC found                 | Modal MIC | MIC found                            | Modal MIC | MIC found                            | Modal MIC |
| wt       | 0.06                      | 0.06      | 0.008, 0.016                         | 0.008     | 0.008                                | 0.008     |
| I        | 0.06, 0.12, 0.25, 2       | 0.12      | 0.016                                | 0.016     | 0.008                                | 0.008     |
| II       | 0.06, 0.12, 0.25          | 0.12      | 0.008, 0.016, 0.03                   | 0.008     | 0.008                                | 0.008     |
| III      | 0.5                       | 0.50      | 0.016                                | 0.016     | 0.008                                | 0.008     |
| IV       | 0.25, 0.50, 2, 4          | 2         | 0.008, 0.06, 0.12, 0.25              | 0.25      | 0.008, 0.016, 0.06, 0.12, 0.25       | 0.12      |
| V        | 1, 2, 4                   | 2         | 0.008, 0.016, 0.03, 0.06, 0.12, 0.25 | 0.03      | 0.008, 0.016, 0.03, 0.06, 0.12, 0.25 | 0.03      |
| VI       | 0.25                      | 0.25      | 0.06                                 | 0.06      | 0.03                                 | 0.03      |
| VII      | 1, 2                      | 2         | 0.06, 0.12, 0.25                     | 0.12      | 0.016, 0.06, 0.12, 0.25              | 0.12      |
| VIII     | 0.5                       | 0.50      | 0.12                                 | 0.12      | 0.03                                 | 0.03      |
| IX       | 0.25, 1, 2                | 1         | 0.03, 0.12                           | 0.12      | 0.008, 0.016, 0.03, 0.06, 0.12       | 0.06      |
| XI       | 1                         | 1         | -                                    | -         | 0.06                                 | 0.06      |
| XII      | 0.06, 0.50, 1, 2          | 1         | 0.03, 0.06, 0.12                     | 0.03      | 0.008, 0.016, 0.03, 0.06, 0.12       | 0.03      |
| XIII     | 0.50, 1, 2, 4             | 1         | 0.06, 0.12, 0.25                     | 0.12      | 0.06, 0.12, 0.25                     | 0.06      |
| XIV      | 0.25                      | 0.25      | 0.008                                | 0.008     | 0.008                                | 0.008     |
| XV       | 0.06                      | 0.06      | 0.008                                | 0.008     | 0.008                                | 0.008     |
| XVI      | -                         | -         | -                                    | -         | 0.008                                | 0.008     |
| XVII     | 1, 2                      | 1         | 0.12                                 | 0.12      | 0.008, 0.06, 0.12                    | 0.12      |
| XVIII    | 2                         | 2         | -                                    | -         | 0.06, 0.12                           | 0.06      |
| XIX      | 1                         | 1         | -                                    | -         | 0.008, 0.016                         | 0.008     |
| XX       | -                         | -         | -                                    | -         | 0.06                                 | 0.06      |
| XXI      | 0.25, 0.50                | 0.50      | 0.03                                 | 0.03      | 0.008                                | 0.008     |
| XXII     | 0.06, 0.50, 1             | 0.06      | 0.09                                 | 0.09      | 0.008, 0.016, 0.03                   | 0.008     |
| XXIV     | 2                         | 2         | 0.12                                 | 0.12      | 0.12                                 | 0.12      |
| XXV      | -                         | -         | -                                    | -         | 0.12                                 | 0.12      |
| XXVI     | -                         | -         | 0.5                                  | 0.50      | 0.12                                 | 0.12      |
| XXVII    | 0.25                      | 0.25      | 0.016                                | 0.016     | 0.008                                | 0.008     |
| XXVIII   | -                         | -         | -                                    | -         | 0.12                                 | 0.12      |
| XXIX     | -                         | -         | -                                    | -         | 0.12                                 | 0.12      |
| XXX nM   | -                         | -         | -                                    | -         | 0.008                                | 0.008     |
| XXXIII   | 1                         | 1         | 0.06                                 | 0.06      | 0.06                                 | 0.06      |
| XXXVII   | 2                         | 2         | 0.25                                 | 0.25      | 0.12                                 | 0.12      |
| X        | 0.25, 0.50, 1.00, 2, 4, 8 | 2         | 0.12, 0.25, 0.50, 1                  | 0.50      | 0.016, 0.03, 0.06, 0.12, 0.25, 0.50  | 0.12      |
| XXIII    | 0.25                      | 0.25      | -                                    | -         | 0.008                                | 0.008     |
| XXX      | -                         | -         | 1                                    | 1         | -                                    | -         |
| XXXI     | -                         | -         | 0.25                                 | 0.25      | -                                    | -         |
| XXXII    | -                         | -         | 0.5                                  | 0.5       | -                                    | -         |
| XXXIV    | 1, 2                      | 2         | 0.12, 0.25                           | 0.25      | 0.03, 0.06, 0.12                     | 0.03      |
| CII      | -                         | -         | 1                                    | 1         | 0.5                                  | 0.50      |
| CI       | 1                         | 1         | 3                                    | 3         | 1.5                                  | 1.5       |
| IIIg&Iva | 1                         | 1         | 0.09                                 | 0.09      | 0.02                                 | 0.02      |
| IIIh     | 2                         | 2         | 0.25                                 | 0.25      | 0.03                                 | 0.03      |
| XXXVI    | -                         | -         | -                                    | -         | 0.008                                | 0.008     |
| XXXVIII  | 0.25, 0.50, 1, 2, 4       | 1         | 0.008, 0.03, 0.06, 0.12              | 0.12      | 0.008, 0.03, 0.06                    | 0.008     |
| Mosaic2  | 4                         | 4         | 0.25, 0.50                           | 0.25      | 0.06                                 | 0.06      |
| Mosaic3  | -                         | -         | 0.25                                 | 0.25      | -                                    | -         |
| Mosaic4  | 0.50, 1                   | 1         | 0.06, 0.12, 0.25                     | 0.25      | 0.008, 0.03                          | 0.03      |
| NG-3     | 2                         | 2         | 0.5                                  | 0.5       | 0.06                                 | 0.06      |
| 30/02    | 2                         | 2         | 0.25                                 | 0.25      | 0.09                                 | 0.09      |
| 35/02    | 2                         | 2         | 0.25                                 | 0.25      | 0.09                                 | 0.09      |
| C        | 4                         | 4         | 8                                    | 8         | 2                                    | 2         |

Table S1. (Continued)

| Patterns | Amino acid position |    |    |    |     |     |     |     |     |     |     |     |     |     |     |     |     |     |     |     |     |     |     |     |
|----------|---------------------|----|----|----|-----|-----|-----|-----|-----|-----|-----|-----|-----|-----|-----|-----|-----|-----|-----|-----|-----|-----|-----|-----|
|          | 35                  | 41 | 70 | 83 | 100 | 101 | 144 | 160 | 173 | 201 | 202 | 203 | 204 | 214 | 230 | 241 | 262 | 279 | 285 | 288 | 291 | 311 | 312 | 316 |
| wt       | M                   | C  | A  | G  | K   | D   | D   | V   | N   | Y   | G   | E   | D   | Q   | Q   | Q   | A   | A   | D   | R   | R   | A   | I   | V   |
| I        | M                   | C  | A  | G  | K   | D   | D   | V   | N   | Y   | G   | E   | D   | Q   | Q   | Q   | A   | A   | D   | R   | R   | A   | I   | V   |
| II       | M                   | C  | A  | G  | K   | D   | D   | V   | N   | Y   | G   | E   | D   | Q   | Q   | Q   | A   | A   | D   | R   | R   | A   | I   | V   |
| III      | M                   | C  | A  | G  | K   | D   | D   | V   | N   | Y   | G   | E   | D   | Q   | Q   | Q   | A   | A   | D   | R   | R   | A   | I   | V   |
| IV       | M                   | C  | A  | G  | K   | D   | D   | V   | N   | Y   | G   | E   | D   | Q   | Q   | Q   | A   | A   | D   | R   | R   | A   | I   | V   |
| V        | M                   | C  | A  | G  | K   | D   | D   | V   | N   | Y   | G   | E   | D   | Q   | Q   | Q   | A   | A   | D   | R   | R   | A   | I   | V   |
| VI       | M                   | C  | A  | G  | K   | D   | D   | V   | N   | Y   | G   | E   | D   | Q   | Q   | Q   | A   | A   | D   | R   | R   | A   | I   | V   |
| VII      | M                   | C  | A  | G  | K   | D   | D   | V   | N   | Y   | G   | E   | D   | Q   | Q   | Q   | A   | A   | D   | R   | R   | A   | I   | V   |
| VIII     | M                   | C  | A  | G  | K   | D   | D   | V   | N   | Y   | G   | E   | D   | Q   | Q   | Q   | A   | A   | D   | R   | R   | A   | I   | V   |
| IX       | M                   | C  | A  | G  | K   | D   | D   | V   | N   | Y   | G   | E   | D   | Q   | Q   | Q   | A   | A   | D   | R   | R   | A   | I   | V   |
| XI       | M                   | C  | A  | G  | K   | D   | D   | V   | N   | Y   | G   | E   | D   | Q   | Q   | Q   | A   | A   | D   | R   | R   | A   | I   | V   |
| XII      | M                   | C  | A  | G  | K   | D   | D   | V   | N   | Y   | G   | E   | D   | Q   | Q   | Q   | A   | A   | D   | R   | R   | A   | I   | V   |
| XIII     | M                   | C  | A  | G  | K   | D   | D   | V   | N   | Y   | G   | E   | D   | Q   | Q   | Q   | A   | A   | D   | R   | R   | A   | I   | V   |
| XIV      | M                   | C  | A  | G  | K   | D   | D   | V   | N   | Y   | G   | E   | D   | Q   | Q   | Q   | A   | A   | D   | R   | R   | A   | I   | V   |
| XV       | M                   | C  | A  | G  | K   | D   | D   | V   | N   | Y   | G   | E   | D   | Q   | Q   | Q   | A   | A   | D   | R   | R   | A   | I   | V   |
| XVI      | M                   | C  | A  | G  | K   | D   | D   | V   | N   | Y   | G   | E   | D   | Q   | Q   | Q   | A   | A   | D   | R   | R   | A   | I   | V   |
| XVII     | M                   | C  | A  | G  | K   | D   | D   | V   | N   | Y   | G   | E   | D   | Q   | Q   | Q   | A   | A   | D   | R   | R   | A   | I   | V   |
| XVIII    | M                   | C  | A  | G  | K   | D   | D   | V   | N   | Y   | G   | E   | D   | Q   | Q   | Q   | A   | A   | D   | R   | R   | A   | I   | V   |
| XIX      | M                   | C  | A  | G  | K   | D   | D   | V   | N   | Y   | G   | E   | D   | Q   | Q   | Q   | A   | A   | D   | R   | R   | A   | I   | V   |
| XX       | M                   | C  | A  | G  | K   | D   | D   | V   | N   | Y   | G   | E   | D   | Q   | Q   | Q   | A   | A   | D   | R   | R   | A   | I   | V   |
| XXI      | M                   | C  | A  | G  | K   | D   | D   | V   | N   | Y   | G   | E   | D   | Q   | Q   | Q   | A   | A   | D   | R   | R   | A   | I   | V   |
| XXII     | M                   | C  | A  | G  | K   | D   | D   | V   | N   | Y   | G   | E   | D   | Q   | Q   | Q   | A   | A   | D   | R   | R   | A   | I   | V   |
| XXIV     | M                   | C  | A  | G  | K   | D   | D   | V   | N   | Y   | G   | E   | D   | Q   | Q   | Q   | A   | A   | D   | R   | R   | A   | I   | V   |
| XXV      | M                   | C  | A  | G  | K   | D   | D   | V   | N   | Y   | G   | E   | D   | Q   | Q   | Q   | A   | A   | D   | R   | R   | A   | I   | V   |
| XXVI     | M                   | C  | A  | G  | K   | D   | D   | V   | N   | Y   | G   | E   | D   | Q   | Q   | Q   | A   | A   | D   | R   | R   | A   | I   | V   |
| XXVII    | M                   | C  | A  | G  | K   | D   | D   | V   | N   | Y   | G   | E   | D   | Q   | Q   | Q   | A   | A   | D   | R   | R   | A   | I   | V   |
| XXVIII   | M                   | C  | A  | G  | K   | D   | D   | V   | N   | Y   | G   | E   | D   | Q   | Q   | Q   | A   | A   | D   | R   | R   | A   | I   | V   |
| XXIX     | M                   | C  | A  | G  | K   | D   | D   | V   | N   | Y   | G   | E   | D   | Q   | Q   | Q   | A   | A   | D   | R   | R   | A   | I   | V   |
| XXX_nM   | M                   | C  | A  | G  | K   | D   | D   | V   | N   | Y   | G   | E   | D   | Q   | Q   | Q   | A   | A   | D   | R   | R   | A   | I   | V   |
| XXXIII   | M                   | C  | A  | G  | K   | D   | D   | V   | N   | Y   | G   | E   | D   | Q   | Q   | Q   | T   | A   | D   | R   | R   | A   | I   | V   |
| XXXVII   | M                   | C  | A  | G  | K   | D   | D   | V   | N   | Y   | G   | E   | D   | Q   | Q   | R   | A   | A   | D   | R   | R   | A   | I   | V   |
| X        | M                   | C  | A  | G  | K   | E   | D   | A   | S   | H   | A   | G   | E   | E   | Q   | Q   | A   | V   | E   | K   | Q   | A   | M   | T   |
| XXIII    | M                   | C  | A  | G  | K   | D   | D   | V   | N   | Y   | G   | E   | D   | Q   | Q   | Q   | A   | A   | D   | R   | R   | A   | I   | V   |
| XXX      | M                   | C  | A  | G  | K   | E   | D   | A   | S   | H   | A   | G   | E   | E   | Q   | Q   | A   | V   | E   | K   | Q   | A   | M   | T   |
| XXXI     | M                   | C  | A  | G  | K   | E   | D   | A   | S   | H   | A   | G   | E   | E   | Q   | Q   | A   | V   | E   | K   | Q   | A   | M   | T   |
| XXXII    | M                   | C  | A  | G  | K   | E   | D   | A   | S   | H   | A   | G   | E   | E   | Q   | Q   | A   | V   | E   | K   | Q   | A   | M   | T   |
| XXXIV    | M                   | C  | A  | G  | K   | E   | D   | A   | S   | H   | A   | G   | E   | E   | Q   | Q   | A   | V   | E   | K   | Q   | A   | M   | T   |
| CII      | M                   | C  | A  | G  | K   | E   | D   | A   | S   | H   | A   | G   | E   | E   | Q   | Q   | A   | V   | E   | K   | Q   | A   | M   | T   |
| CI       | M                   | C  | A  | G  | K   | E   | D   | A   | S   | H   | A   | G   | E   | E   | Q   | Q   | A   | V   | E   | K   | Q   | A   | M   | T   |
| IIIg&Iva | M                   | C  | A  | G  | K   | E   | D   | A   | S   | H   | A   | G   | E   | E   | Q   | Q   | A   | V   | E   | K   | Q   | A   | M   | T   |
| IIIh     | M                   | C  | A  | G  | K   | E   | D   | A   | S   | H   | A   | G   | E   | E   | Q   | Q   | A   | V   | E   | K   | Q   | A   | M   | T   |
| XXXVI    | M                   | C  | A  | G  | K   | D   | D   | V   | N   | Y   | G   | E   | D   | Q   | Q   | Q   | A   | V   | E   | K   | Q   | A   | I   | V   |
| XXXVIII  | I                   | G  | T  | G  | K   | E   | D   | V   | N   | H   | A   | G   | E   | Q   | K   | Q   | A   | A   | D   | R   | R   | A   | M   | T   |
| Mosaic2  | M                   | C  | A  | G  | K   | D   | D   | A   | S   | H   | A   | G   | E   | E   | Q   | Q   | A   | V   | E   | K   | Q   | A   | M   | T   |
| Mosaic3  | M                   | C  | A  | G  | K   | E   | D   | A   | S   | H   | A   | G   | E   | Q   | Q   | Q   | A   | V   | E   | K   | Q   | A   | M   | T   |
| Mosaic4  | M                   | C  | A  | G  | N   | E   | D   | A   | S   | H   | G   | E   | D   | Q   | K   | Q   | A   | A   | N   | R   | R   | A   | M   | T   |
| NG-3     | M                   | C  | A  | V  | K   | E   | D   | A   | S   | H   | A   | G   | E   | E   | Q   | Q   | A   | V   | E   | K   | Q   | A   | M   | T   |
| 30/02    | M                   | C  | A  | G  | K   | E   | A   | A   | S   | H   | A   | G   | E   | E   | Q   | Q   | A   | V   | E   | K   | Q   | A   | M   | T   |
| 35/02    | M                   | C  | A  | G  | K   | E   | D   | A   | N   | H   | A   | G   | E   | E   | Q   | Q   | A   | V   | E   | K   | Q   | A   | M   | T   |
| C        | M                   | C  | A  | G  | K   | E   | D   | A   | S   | H   | A   | G   | E   | E   | Q   | Q   | A   | V   | E   | K   | Q   | V   | M   | P   |

Table S1. (Continued)

| Patterns | Amino acid position |     |     |     |     |     |     |     |     |     |     |     |     |     |       |     |     |     |     |     |     |     |     |
|----------|---------------------|-----|-----|-----|-----|-----|-----|-----|-----|-----|-----|-----|-----|-----|-------|-----|-----|-----|-----|-----|-----|-----|-----|
|          | 323                 | 324 | 326 | 327 | 328 | 329 | 330 | 331 | 332 | 335 | 341 | 342 | 343 | 345 | 45-34 | 352 | 373 | 375 | 376 | 377 | 382 | 385 | 388 |
| wt       | A                   | G   | T   | D   | L   | N   | E   | R   | L   | Q   | P   | S   | P   | R   | -     | S   | R   | G   | A   | E   | F   | E   | I   |
| I        | A                   | G   | T   | D   | L   | N   | E   | R   | L   | Q   | P   | S   | P   | R   | D     | S   | R   | G   | A   | E   | F   | E   | I   |
| II       | A                   | G   | T   | D   | L   | N   | E   | R   | L   | Q   | P   | S   | P   | R   | D     | S   | R   | G   | A   | E   | F   | E   | I   |
| III      | A                   | G   | T   | D   | L   | N   | E   | R   | L   | Q   | P   | S   | P   | R   | D     | S   | R   | G   | A   | E   | F   | E   | I   |
| IV       | A                   | G   | T   | D   | L   | N   | E   | R   | L   | Q   | P   | S   | P   | R   | D     | S   | R   | G   | A   | E   | F   | E   | I   |
| V        | A                   | G   | T   | D   | L   | N   | E   | R   | L   | Q   | P   | S   | P   | R   | D     | S   | R   | G   | A   | E   | F   | E   | I   |
| VI       | A                   | G   | T   | D   | L   | N   | E   | R   | L   | Q   | P   | S   | P   | R   | D     | S   | R   | G   | A   | E   | F   | E   | I   |
| VII      | A                   | G   | T   | D   | L   | N   | E   | R   | L   | Q   | P   | S   | P   | R   | D     | S   | R   | G   | A   | E   | F   | E   | I   |
| VIII     | A                   | G   | T   | D   | L   | N   | E   | R   | L   | Q   | P   | S   | P   | R   | D     | S   | R   | G   | A   | E   | F   | E   | I   |
| IX       | A                   | G   | T   | D   | L   | N   | E   | R   | L   | Q   | P   | S   | P   | R   | D     | S   | R   | G   | A   | E   | F   | E   | I   |
| XI       | A                   | G   | T   | D   | L   | N   | E   | R   | L   | Q   | P   | S   | P   | R   | D     | S   | R   | G   | A   | E   | F   | E   | I   |
| XII      | A                   | G   | T   | D   | L   | N   | E   | R   | L   | Q   | P   | S   | P   | R   | D     | S   | R   | G   | A   | E   | F   | E   | I   |
| XIII     | A                   | G   | T   | D   | L   | N   | E   | R   | L   | Q   | P   | S   | P   | R   | D     | S   | R   | G   | A   | E   | F   | E   | I   |
| XIV      | A                   | G   | T   | D   | L   | N   | E   | R   | L   | Q   | P   | S   | P   | R   | D     | S   | R   | G   | A   | E   | F   | E   | I   |
| XV       | A                   | G   | T   | D   | L   | N   | E   | R   | L   | Q   | P   | S   | P   | R   | -     | S   | R   | G   | A   | E   | F   | E   | I   |
| XVI      | A                   | G   | T   | D   | L   | N   | E   | R   | L   | Q   | P   | S   | P   | R   | D     | S   | R   | G   | A   | E   | F   | E   | I   |
| XVII     | A                   | G   | T   | D   | L   | N   | E   | R   | L   | Q   | P   | S   | P   | R   | D     | S   | R   | G   | A   | E   | F   | E   | I   |
| XVIII    | A                   | G   | T   | D   | L   | N   | E   | R   | L   | Q   | P   | S   | P   | R   | D     | S   | R   | G   | A   | E   | F   | E   | I   |
| XIX      | A                   | G   | T   | D   | L   | N   | E   | R   | L   | Q   | P   | S   | P   | R   | D     | S   | R   | G   | A   | E   | F   | E   | I   |
| XX       | A                   | G   | T   | D   | L   | N   | E   | R   | L   | Q   | P   | S   | P   | R   | D     | S   | R   | G   | A   | E   | F   | E   | I   |
| XXI      | A                   | G   | T   | D   | L   | N   | E   | R   | L   | Q   | P   | S   | P   | R   | D     | S   | R   | G   | A   | E   | F   | E   | I   |
| XXII     | A                   | G   | T   | D   | L   | N   | E   | R   | L   | Q   | P   | S   | P   | R   | D     | S   | R   | G   | A   | E   | F   | E   | I   |
| XXIV     | A                   | G   | T   | D   | L   | N   | E   | R   | L   | Q   | P   | S   | P   | R   | D     | S   | R   | G   | A   | E   | F   | E   | I   |
| XXV      | A                   | G   | T   | D   | L   | N   | E   | R   | L   | Q   | P   | S   | P   | R   | D     | S   | R   | G   | A   | E   | F   | E   | I   |
| XXVI     | A                   | G   | T   | D   | L   | N   | E   | R   | L   | Q   | P   | S   | P   | R   | D     | S   | R   | G   | A   | E   | F   | E   | I   |
| XXVII    | A                   | G   | T   | D   | L   | N   | E   | R   | L   | Q   | P   | S   | P   | R   | D     | S   | R   | G   | A   | E   | F   | E   | I   |
| XXVIII   | A                   | G   | T   | D   | L   | N   | E   | R   | L   | Q   | P   | S   | P   | R   | D     | S   | R   | G   | A   | E   | F   | E   | I   |
| XXIX     | A                   | G   | T   | D   | L   | N   | E   | R   | L   | Q   | P   | S   | P   | R   | D     | S   | R   | G   | A   | E   | F   | E   | I   |
| XXX_nM   | A                   | G   | T   | D   | L   | N   | E   | R   | L   | Q   | P   | S   | P   | R   | D     | S   | R   | G   | A   | E   | F   | E   | I   |
| XXXIII   | A                   | G   | T   | D   | L   | N   | E   | R   | L   | Q   | P   | S   | P   | R   | D     | S   | R   | G   | A   | E   | F   | E   | I   |
| XXXVII   | A                   | G   | T   | D   | L   | N   | E   | R   | L   | Q   | P   | S   | P   | R   | D     | S   | R   | G   | A   | E   | F   | E   | I   |
| X        | S                   | G   | V   | D   | A   | T   | D   | T   | F   | L   | S   | A   | T   | Q   | -     | T   | M   | T   | P   | K   | F   | D   | V   |
| XXIII    | A                   | G   | T   | D   | L   | N   | E   | R   | L   | Q   | P   | S   | P   | R   | D     | S   | R   | G   | A   | E   | F   | E   | I   |
| XXX      | S                   | G   | V   | D   | A   | T   | D   | T   | F   | L   | S   | A   | T   | Q   | -     | T   | M   | T   | P   | K   | F   | D   | V   |
| XXXI     | S                   | G   | V   | D   | A   | T   | D   | T   | F   | L   | S   | A   | T   | Q   | -     | T   | M   | T   | P   | K   | F   | D   | V   |
| XXXII    | S                   | G   | V   | D   | A   | T   | D   | T   | F   | L   | S   | A   | T   | Q   | -     | T   | M   | T   | P   | K   | F   | D   | V   |
| XXXIV    | S                   | G   | V   | D   | A   | T   | D   | T   | F   | L   | S   | A   | T   | Q   | -     | T   | M   | T   | P   | K   | F   | D   | V   |
| CII      | S                   | G   | V   | D   | A   | T   | D   | T   | F   | L   | S   | A   | T   | Q   | -     | T   | M   | T   | P   | K   | F   | D   | V   |
| CI       | S                   | G   | V   | D   | A   | T   | D   | T   | F   | L   | S   | A   | T   | Q   | -     | T   | M   | T   | P   | K   | F   | D   | V   |
| IIIg&Iva | S                   | G   | V   | D   | A   | T   | D   | T   | F   | L   | S   | A   | T   | Q   | -     | T   | M   | T   | P   | K   | F   | D   | V   |
| IIIh     | S                   | G   | V   | D   | A   | T   | D   | T   | F   | L   | S   | A   | T   | Q   | -     | T   | M   | T   | P   | K   | F   | D   | V   |
| XXXVI    | A                   | E   | T   | N   | L   | N   | E   | R   | L   | Q   | P   | A   | Q   | R   | -     | S   | R   | S   | S   | K   | L   | S   | I   |
| XXXVIII  | S                   | G   | V   | D   | A   | T   | D   | T   | F   | L   | P   | A   | T   | Q   | -     | T   | M   | T   | P   | K   | F   | D   | V   |
| Mosaic2  | S                   | G   | V   | D   | A   | T   | D   | T   | F   | L   | S   | A   | T   | Q   | -     | T   | M   | T   | P   | K   | F   | D   | V   |
| Mosaic3  | S                   | G   | V   | D   | A   | T   | D   | T   | F   | L   | S   | A   | T   | Q   | -     | T   | M   | T   | P   | K   | F   | D   | V   |
| Mosaic4  | S                   | G   | V   | D   | A   | T   | D   | T   | F   | L   | S   | A   | T   | Q   | -     | T   | M   | T   | P   | K   | F   | D   | V   |
| NG-3     | S                   | G   | V   | D   | A   | T   | D   | T   | F   | L   | S   | A   | T   | Q   | -     | T   | M   | T   | P   | K   | F   | D   | V   |
| 30/02    | S                   | G   | V   | D   | A   | T   | D   | T   | F   | L   | S   | A   | T   | Q   | -     | T   | M   | T   | P   | K   | F   | D   | V   |
| 35/02    | S                   | G   | V   | D   | A   | T   | D   | T   | F   | L   | S   | A   | T   | Q   | -     | T   | M   | T   | P   | K   | F   | D   | V   |
| C        | S                   | G   | V   | D   | T   | T   | D   | T   | F   | L   | P   | A   | T   | Q   | -     | T   | M   | T   | P   | K   | F   | D   | V   |

Table S1. (Continued)

| Patterns | Amino acid position |     |     |     |     |     |     |     |     |     |     |     |     |     |     |     |     |     |     |     |       |     |     |
|----------|---------------------|-----|-----|-----|-----|-----|-----|-----|-----|-----|-----|-----|-----|-----|-----|-----|-----|-----|-----|-----|-------|-----|-----|
|          | 400                 | 403 | 406 | 409 | 411 | 412 | 437 | 443 | 447 | 457 | 461 | 462 | 464 | 465 | 468 | 469 | 472 | 480 | 483 | 485 | 88-48 | 501 | 504 |
| wt       | T                   | L   | N   | R   | R   | P   | A   | V   | L   | Q   | I   | F   | E   | S   | R   | E   | N   | P   | T   | T   | -     | A   | F   |
| I        | T                   | L   | N   | R   | R   | P   | A   | V   | L   | Q   | I   | F   | E   | S   | R   | E   | N   | P   | T   | T   | -     | A   | F   |
| II       | T                   | L   | N   | R   | R   | P   | A   | V   | L   | Q   | I   | F   | E   | S   | R   | E   | N   | P   | T   | T   | -     | A   | L   |
| III      | T                   | L   | N   | R   | R   | P   | A   | V   | L   | Q   | I   | F   | E   | S   | R   | E   | N   | P   | T   | T   | -     | A   | L   |
| IV       | T                   | L   | N   | R   | R   | P   | A   | V   | L   | Q   | I   | F   | E   | S   | R   | E   | N   | P   | T   | T   | -     | A   | L   |
| V        | T                   | L   | N   | R   | R   | P   | A   | V   | L   | Q   | I   | F   | E   | S   | R   | E   | N   | P   | T   | T   | -     | A   | L   |
| VI       | T                   | L   | N   | R   | R   | P   | A   | V   | L   | Q   | I   | F   | E   | S   | R   | E   | N   | P   | T   | T   | -     | A   | L   |
| VII      | T                   | L   | N   | R   | R   | P   | A   | V   | L   | Q   | I   | F   | E   | S   | R   | E   | N   | P   | T   | T   | -     | V   | L   |
| VIII     | T                   | L   | N   | R   | R   | P   | A   | V   | L   | Q   | I   | F   | E   | S   | R   | E   | N   | P   | T   | T   | -     | V   | L   |
| IX       | T                   | L   | N   | R   | R   | P   | A   | V   | L   | Q   | I   | F   | E   | S   | R   | E   | N   | P   | T   | T   | -     | A   | L   |
| XI       | T                   | L   | N   | R   | R   | P   | A   | V   | L   | Q   | I   | F   | E   | S   | R   | E   | N   | P   | T   | T   | -     | V   | L   |
| XII      | T                   | L   | N   | R   | R   | P   | A   | V   | L   | Q   | I   | F   | E   | S   | R   | E   | N   | P   | T   | T   | -     | A   | L   |
| XIII     | T                   | L   | N   | R   | R   | P   | A   | V   | L   | Q   | I   | F   | E   | S   | R   | E   | N   | P   | T   | T   | -     | V   | L   |
| XIV      | T                   | L   | N   | R   | R   | P   | A   | V   | L   | Q   | I   | F   | E   | S   | R   | E   | N   | P   | T   | T   | -     | A   | L   |
| XV       | T                   | L   | N   | R   | R   | P   | A   | V   | L   | Q   | I   | F   | E   | S   | R   | E   | N   | P   | T   | T   | -     | A   | F   |
| XVI      | T                   | L   | N   | R   | R   | P   | A   | V   | L   | Q   | I   | F   | E   | S   | R   | E   | N   | P   | T   | T   | -     | A   | L   |
| XVII     | T                   | L   | N   | R   | R   | P   | A   | V   | L   | Q   | I   | F   | E   | S   | R   | E   | N   | P   | T   | T   | -     | V   | L   |
| XVIII    | T                   | L   | N   | R   | R   | P   | A   | V   | L   | Q   | I   | F   | E   | S   | R   | E   | N   | P   | T   | T   | -     | T   | L   |
| XIX      | T                   | L   | N   | R   | R   | P   | A   | V   | L   | Q   | I   | F   | E   | S   | R   | E   | N   | P   | T   | T   | -     | A   | L   |
| XX       | T                   | L   | N   | R   | R   | P   | A   | V   | L   | Q   | I   | F   | E   | L   | R   | E   | N   | P   | T   | T   | -     | A   | L   |
| XXI      | T                   | L   | N   | R   | R   | P   | A   | V   | L   | Q   | I   | F   | E   | S   | R   | E   | N   | P   | T   | T   | -     | V   | L   |
| XXII     | T                   | L   | N   | R   | R   | P   | A   | V   | L   | Q   | I   | F   | E   | S   | R   | E   | N   | P   | T   | T   | -     | A   | L   |
| XXIV     | T                   | L   | N   | R   | R   | P   | A   | V   | L   | Q   | I   | F   | E   | S   | R   | E   | N   | P   | T   | T   | -     | A   | L   |
| XXV      | T                   | L   | N   | R   | R   | P   | A   | V   | L   | Q   | I   | F   | E   | S   | R   | E   | N   | P   | T   | T   | -     | T   | L   |
| XXVI     | T                   | L   | N   | R   | R   | P   | A   | V   | L   | Q   | I   | F   | E   | S   | R   | E   | N   | P   | T   | T   | -     | V   | L   |
| XXVII    | T                   | L   | N   | R   | R   | P   | A   | V   | L   | Q   | I   | F   | E   | S   | R   | E   | N   | P   | T   | T   | -     | V   | L   |
| XXVIII   | T                   | L   | N   | R   | R   | P   | A   | V   | L   | Q   | I   | F   | E   | S   | R   | E   | N   | P   | T   | T   | -     | V   | L   |
| XXIX     | T                   | L   | N   | R   | R   | P   | A   | V   | L   | Q   | I   | F   | E   | S   | R   | E   | N   | P   | T   | T   | -     | V   | L   |
| XXX nM   | T                   | L   | N   | R   | R   | P   | A   | V   | L   | Q   | I   | F   | E   | S   | R   | E   | N   | P   | T   | T   | -     | T   | L   |
| XXXIII   | T                   | L   | N   | R   | R   | P   | A   | V   | L   | Q   | I   | F   | E   | S   | R   | E   | N   | P   | T   | T   | -     | V   | L   |
| XXXVII   | T                   | L   | N   | R   | R   | P   | A   | V   | L   | Q   | I   | F   | E   | S   | R   | E   | N   | P   | T   | T   | -     | A   | L   |
| X        | T                   | L   | S   | R   | Q   | K   | V   | E   | V   | K   | V   | I   | A   | S   | K   | K   | E   | A   | T   | T   | -     | A   | L   |
| XXIII    | T                   | L   | N   | R   | R   | P   | V   | E   | V   | K   | V   | I   | A   | S   | K   | K   | E   | A   | T   | T   | -     | A   | L   |
| XXX      | T                   | L   | S   | R   | Q   | K   | V   | E   | V   | K   | V   | I   | A   | S   | K   | K   | E   | A   | T   | T   | -     | V   | L   |
| XXXI     | T                   | L   | S   | R   | Q   | K   | V   | E   | V   | K   | V   | I   | A   | S   | K   | K   | E   | A   | T   | T   | -     | A   | L   |
| XXXII    | T                   | L   | S   | R   | Q   | K   | V   | E   | V   | K   | V   | I   | A   | S   | K   | K   | E   | A   | T   | T   | -     | A   | L   |
| XXXIV    | T                   | L   | S   | R   | Q   | K   | V   | E   | V   | K   | V   | I   | A   | S   | K   | K   | E   | A   | T   | T   | -     | A   | L   |
| CII      | T                   | L   | S   | R   | Q   | K   | V   | E   | V   | K   | V   | I   | A   | S   | K   | K   | E   | A   | T   | T   | -     | A   | L   |
| CI       | T                   | L   | S   | R   | Q   | K   | V   | E   | V   | K   | V   | I   | A   | S   | K   | K   | E   | A   | T   | T   | -     | P   | L   |
| IIIg&Iva | T                   | L   | S   | R   | Q   | K   | V   | E   | V   | K   | V   | I   | A   | S   | K   | K   | E   | A   | T   | T   | V     | A   | L   |
| IIIh     | T                   | L   | S   | R   | Q   | K   | V   | E   | V   | K   | V   | I   | A   | S   | K   | K   | E   | A   | T   | T   | -     | A   | L   |
| XXXVI    | S                   | V   | N   | K   | R   | P   | V   | V   | V   | K   | V   | I   | A   | S   | K   | K   | E   | A   | T   | T   | -     | A   | L   |
| XXXVIII  | T                   | L   | N   | R   | R   | P   | A   | V   | V   | Q   | I   | F   | E   | S   | R   | E   | N   | P   | T   | T   | -     | A   | F   |
| Mosaic2  | T                   | L   | S   | R   | Q   | K   | V   | E   | V   | K   | V   | I   | A   | S   | K   | K   | E   | A   | T   | T   | -     | A   | L   |
| Mosaic3  | T                   | L   | S   | R   | Q   | K   | V   | E   | V   | K   | V   | I   | A   | S   | K   | K   | E   | A   | T   | T   | -     | A   | L   |
| Mosaic4  | T                   | L   | S   | R   | Q   | K   | V   | E   | V   | K   | V   | I   | A   | S   | K   | K   | E   | A   | T   | T   | -     | V   | L   |
| NG-3     | T                   | L   | S   | R   | Q   | K   | V   | E   | V   | K   | V   | I   | A   | S   | K   | K   | E   | A   | T   | T   | -     | A   | L   |
| 30/02    | T                   | L   | S   | R   | Q   | K   | V   | E   | V   | K   | V   | I   | A   | S   | K   | K   | E   | A   | T   | T   | -     | A   | L   |
| 35/02    | T                   | L   | S   | R   | Q   | K   | V   | E   | V   | K   | V   | I   | A   | S   | K   | K   | E   | A   | T   | T   | -     | A   | L   |
| C        | S                   | V   | N   | K   | R   | P   | V   | E   | V   | K   | V   | I   | A   | S   | K   | K   | E   | A   | S   | I   | -     | A   | L   |

Table S1. (Continued)

| Patterns | Amino acid position |     |     |     |     |     |     |     |     |     |     |     |     |     |     |     |       | Source |                 |
|----------|---------------------|-----|-----|-----|-----|-----|-----|-----|-----|-----|-----|-----|-----|-----|-----|-----|-------|--------|-----------------|
|          | 510                 | 512 | 515 | 516 | 532 | 534 | 541 | 542 | 545 | 549 | 551 | 552 | 555 | 556 | 563 | 566 | 73-57 |        | 574             |
| wt       | A                   | N   | V   | A   | A   | T   | H   | G   | G   | A   | P   | P   | K   | I   | I   | I   | -     | A      | 1-3             |
| I        | A                   | N   | V   | A   | A   | T   | H   | G   | G   | A   | P   | P   | K   | I   | I   | I   | -     | A      | 4,5             |
| II       | V                   | N   | V   | G   | A   | T   | H   | G   | G   | A   | P   | P   | K   | I   | I   | I   | -     | A      | 2-8             |
| III      | V                   | N   | V   | G   | A   | T   | H   | G   | G   | A   | P   | P   | K   | I   | I   | V   | N     | V      | 4               |
| IV       | V                   | N   | V   | G   | A   | T   | H   | S   | G   | A   | P   | P   | K   | I   | I   | I   | -     | A      | 1, 4, 5, 9, 10  |
| V        | V                   | N   | V   | G   | A   | T   | H   | S   | G   | A   | P   | P   | K   | I   | I   | V   | N     | V      | 1, 3-5, 9-11    |
| VI       | V                   | N   | V   | A   | A   | T   | H   | G   | G   | A   | L   | P   | K   | I   | I   | I   | -     | A      | 4               |
| VII      | V                   | N   | V   | G   | A   | T   | H   | S   | G   | A   | P   | P   | K   | I   | I   | I   | -     | A      | 4, 5, 7, 12     |
| VIII     | V                   | N   | V   | A   | A   | T   | H   | S   | G   | A   | L   | P   | K   | I   | I   | I   | -     | A      | 4               |
| IX       | V                   | N   | V   | G   | A   | T   | H   | G   | G   | A   | L   | P   | K   | I   | I   | I   | -     | A      | 4, 5, 10, 12    |
| XI       | V                   | N   | V   | G   | A   | T   | H   | G   | G   | A   | L   | P   | K   | I   | I   | I   | -     | A      | 5               |
| XII      | V                   | N   | V   | G   | A   | T   | H   | G   | G   | A   | S   | P   | K   | I   | I   | I   | -     | A      | 1, 5, 9, 13     |
| XIII     | V                   | N   | V   | G   | A   | T   | H   | G   | G   | A   | S   | P   | K   | I   | I   | I   | -     | A      | 5, 6, 9, 10, 12 |
| XIV      | V                   | N   | V   | G   | A   | T   | N   | G   | G   | A   | P   | P   | K   | I   | I   | I   | -     | A      | 5, 9            |
| XV       | A                   | N   | V   | A   | A   | T   | N   | G   | G   | A   | P   | P   | K   | I   | I   | I   | -     | A      | 5, 7            |
| XVI      | V                   | N   | V   | G   | A   | T   | H   | G   | G   | A   | P   | P   | K   | I   | I   | I   | N     | V      | 5               |
| XVII     | V                   | N   | V   | G   | A   | T   | H   | S   | G   | A   | P   | P   | K   | I   | I   | V   | N     | V      | 5, 9, 10        |
| XVIII    | V                   | N   | V   | G   | A   | T   | H   | S   | G   | A   | P   | P   | K   | I   | I   | V   | N     | V      | 5               |
| XIX      | V                   | N   | V   | G   | A   | T   | N   | G   | G   | A   | P   | P   | K   | I   | I   | V   | N     | V      | 5               |
| XX       | V                   | N   | V   | G   | A   | T   | N   | G   | G   | A   | P   | P   | K   | I   | I   | V   | N     | V      | 5               |
| XXI      | V                   | N   | V   | G   | A   | T   | N   | G   | G   | A   | P   | V   | Q   | V   | I   | V   | N     | V      | 1, 5, 10        |
| XXII     | V                   | N   | V   | G   | A   | T   | N   | G   | G   | A   | P   | V   | Q   | V   | I   | V   | N     | V      | 5, 12           |
| XXIV     | V                   | N   | V   | G   | A   | T   | H   | S   | G   | A   | S   | P   | K   | I   | I   | V   | N     | V      | 9               |
| XXV      | V                   | N   | V   | G   | A   | T   | H   | S   | G   | A   | P   | P   | K   | I   | I   | I   | -     | A      | 10              |
| XXVI     | V                   | N   | V   | G   | A   | T   | H   | S   | G   | A   | S   | P   | K   | I   | I   | V   | -     | A      | 10, 11          |
| XXVII    | V                   | N   | V   | G   | A   | T   | H   | G   | G   | A   | P   | P   | K   | I   | I   | I   | -     | A      | 10              |
| XXVIII   | V                   | N   | V   | G   | A   | T   | H   | G   | G   | A   | P   | P   | K   | I   | I   | V   | -     | A      | 10              |
| XXIX     | V                   | N   | V   | G   | A   | T   | Y   | G   | G   | A   | P   | P   | K   | I   | I   | I   | -     | A      | 10              |
| XXX_nM   | V                   | N   | V   | G   | A   | T   | H   | S   | G   | A   | P   | P   | K   | I   | V   | I   | -     | A      | 10              |
| XXXIII   | V                   | N   | V   | G   | A   | T   | H   | S   | G   | A   | P   | P   | K   | I   | I   | I   | -     | A      | 8, 12           |
| XXXVII   | V                   | N   | V   | G   | A   | T   | H   | G   | G   | A   | S   | P   | K   | I   | I   | I   | -     | A      | 13              |
| X        | V                   | Y   | V   | A   | A   | T   | N   | G   | S   | T   | P   | V   | Q   | V   | I   | V   | N     | V      | 1-9, 11-13      |
| XXIII    | V                   | Y   | V   | A   | A   | T   | N   | G   | G   | T   | P   | V   | Q   | V   | I   | V   | N     | V      | 5               |
| XXX      | V                   | Y   | V   | A   | A   | T   | N   | G   | S   | T   | P   | V   | Q   | V   | I   | V   | N     | V      | 11              |
| XXXI     | V                   | Y   | V   | A   | V   | T   | N   | G   | S   | T   | P   | V   | Q   | V   | I   | V   | N     | V      | 11              |
| XXXII    | V                   | Y   | V   | A   | A   | T   | N   | G   | S   | A   | L   | P   | K   | I   | I   | I   | -     | A      | 11              |
| XXXIV    | V                   | Y   | V   | A   | A   | T   | N   | G   | S   | A   | P   | P   | K   | I   | I   | I   | -     | A      | 6, 13-15        |
| CII      | V                   | Y   | V   | A   | A   | A   | N   | G   | S   | A   | P   | P   | K   | I   | I   | I   | -     | A      | 16              |
| CI       | V                   | Y   | V   | A   | A   | T   | N   | G   | S   | A   | P   | P   | K   | I   | I   | I   | -     | A      | 7, 17           |
| IIIg&Iva | V                   | Y   | V   | A   | A   | T   | N   | G   | S   | A   | P   | P   | K   | I   | I   | I   | -     | A      | 3               |
| IIIh     | V                   | Y   | V   | A   | A   | T   | N   | G   | S   | T   | P   | P   | K   | I   | I   | I   | -     | A      | 3, 6            |
| XXXVI    | V                   | N   | V   | A   | A   | T   | N   | G   | G   | T   | P   | V   | Q   | V   | I   | V   | N     | V      | 8               |
| XXXVIII  | A                   | N   | I   | A   | A   | T   | H   | G   | G   | A   | P   | P   | K   | I   | I   | I   | -     | A      | 13-15           |
| Mosaic2  | V                   | Y   | V   | A   | A   | T   | N   | G   | S   | T   | P   | V   | Q   | V   | I   | V   | N     | V      | 1, 3            |
| Mosaic3  | V                   | Y   | V   | A   | A   | T   | N   | G   | S   | T   | P   | V   | Q   | V   | I   | V   | N     | V      | 1               |
| Mosaic4  | V                   | N   | V   | A   | A   | T   | N   | G   | G   | T   | P   | V   | Q   | V   | I   | V   | N     | V      | 1, 3            |
| NG-3     | V                   | Y   | V   | A   | A   | T   | N   | G   | S   | T   | P   | V   | Q   | V   | I   | V   | N     | V      | 6               |
| 30/02    | V                   | Y   | V   | A   | A   | T   | N   | G   | S   | T   | P   | V   | Q   | V   | I   | V   | N     | V      | 12              |
| 35/02    | V                   | Y   | V   | A   | A   | T   | N   | G   | S   | T   | P   | V   | Q   | V   | I   | V   | N     | V      | 12              |
| C        | V                   | Y   | V   | A   | A   | T   | N   | G   | S   | T   | P   | V   | Q   | V   | I   | V   | N     | V      | 8               |

**Table S1.** (Continued).

**References**

1. Takahata S, Senju N, Osaki Y, Yoshida T, Ida T. Amino acid substitutions in mosaic penicillin-binding protein 2 associated with reduced susceptibility to cefixime in clinical isolates of *Neisseria gonorrhoeae*. *Antimicrob Agents Chemother.* 2006;50(11):3638-45.
2. Tanaka M, Nakayama H, Huruya K, Konomi I, Irie S, Kanayama A, et al. Analysis of mutations within multiple genes associated with resistance in a clinical isolate of *Neisseria gonorrhoeae* with reduced ceftriaxone susceptibility that shows a multidrug-resistant phenotype. *Int J Antimicrob Agents.* 2006;27(1):20-6.
3. Takahashi S, Kurimura Y, Hashimoto J, Uehara T, Hiyama Y, Iwasawa A, et al. Antimicrobial susceptibility and penicillin-binding protein 1 and 2 mutations in *Neisseria gonorrhoeae* isolated from male urethritis in Sapporo, Japan. *J Infect Chemother.* 2013;19(1):50-6.
4. Ito M, Deguchi T, Mizutani KS, Yasuda M, Yokoi S, Ito S, et al. Emergence and spread of *Neisseria gonorrhoeae* clinical isolates harboring mosaic-like structure of penicillin-binding protein 2 in Central Japan. *Antimicrob Agents Chemother.* 2005;49(1):137-43.
5. Whiley DM, Linnios EA, Ray S, Sloots TP, Tapsall JW. Diversity of penA alterations and subtypes in *Neisseria gonorrhoeae* strains from Sydney, Australia, that are less susceptible to ceftriaxone. *Antimicrob Agents Chemother.* 2007;51(9):3111-6.
6. Osaka K, Takakura T, Narukawa K, Takahata M, Endo K, Kiyota H, et al. Analysis of amino acid sequences of penicillin-binding protein 2 in clinical isolates of *Neisseria gonorrhoeae* with reduced susceptibility to cefixime and ceftriaxone. *J Infect Chemother.* 2008;14(3):195-203.
7. Unemo M, Golparian D, Nicholas R, Ohnishi M, Gallay A, Sednaoui P. High-level cefixime- and ceftriaxone-resistant *Neisseria gonorrhoeae* in France: novel penA mosaic allele in a successful international clone causes treatment failure. *Antimicrob Agents Chemother.* 2012;56(3):1273-80.
8. Ohnishi M, Golparian D, Shimuta K, Saika T, Hoshina S, Iwasaku K, et al. Is *Neisseria gonorrhoeae* initiating a future era of untreatable gonorrhea?: detailed characterization of the first strain with high-level resistance to ceftriaxone. *Antimicrob Agents Chemother.* 2011 Jul;55(7):3538-45.
9. Lee SG, Lee H, Jeong SH, Yong D, Chung GT, Lee YS, et al. Various penA mutations together with mtrR, porB and ponA mutations in *Neisseria gonorrhoeae* isolates with reduced susceptibility to cefixime or ceftriaxone. *J Antimicrob Chemother.* 2010 Apr;65(4):669-75.
10. Liao M, Gu WM, Yang Y, Dillon JA. Analysis of mutations in multiple loci of *Neisseria gonorrhoeae* isolates reveals effects of PIB, PBP2 and MtrR on reduced susceptibility to ceftriaxone. *J Antimicrob Chemother.* 2011;66(5):1016-23.
11. Ohnishi M, Watanabe Y, Ono E, Takahashi C, Oya H, Kuroki T, et al. Spread of a chromosomal cefixime-resistant penA gene among different *Neisseria gonorrhoeae* lineages. *Antimicrob Agents Chemother.* 2010;54(3):1060-7.
12. Lindberg R, Fredlund H, Nicholas R, Unemo M. *Neisseria gonorrhoeae* isolates with reduced susceptibility to cefixime and ceftriaxone: association with genetic polymorphisms in penA, mtrR, porB1b, and ponA. *Antimicrob Agents Chemother.* 2007;51(6):2117-22.
13. Allen VG, Farrell DJ, Rebbapragada A, Tan J, Tijet N, Perusini SJ, et al. Molecular analysis of antimicrobial resistance mechanisms in *Neisseria gonorrhoeae* isolates from Ontario, Canada. *Antimicrob Agents Chemother.* 2011;55(2):703-12.
14. Pandori M, Barry PM, Wu A, Ren A, Whittington WL, Liska S, et al. Mosaic penicillin-binding protein 2 in *Neisseria gonorrhoeae* isolates collected in 2008 in San Francisco, California. *Antimicrob Agents Chemother.* 2009;53(9):4032-4.
15. Buono S, Wu A, Hess DC, Carlson JS, Rauch L, Philip SS, et al. Using the *Neisseria gonorrhoeae* multiantigen sequence-typing method to assess strain diversity and antibiotic resistance in San Francisco, California. *Microb Drug Resist.* 2012;18(5):510-7.
16. Unemo M, Golparian D, Stary A, Eigentler A. First *Neisseria gonorrhoeae* strain with resistance to cefixime causing gonorrhoea treatment failure in Austria, 2011. *Euro Surveill.* 2011;16(43):19998.
17. Camara J, Serra J, Ayats J, Bastida T, Carnicer-Pont D, Andreu A, et al. Molecular characterization of two high-level ceftriaxone-resistant *Neisseria gonorrhoeae* isolates detected in Catalonia, Spain. *J Antimicrob Chemother.* 2012;67(8):1858-60.

**Table S2.** Ligand descriptors used for construction and validation of proteochemometric modeling of PBP2 *Neisseria gonorrhoeae*.

|              | Compound    | Ligand descriptors |      |     |       |       |        |        |                |          |       |        |        |       |
|--------------|-------------|--------------------|------|-----|-------|-------|--------|--------|----------------|----------|-------|--------|--------|-------|
|              |             | MW                 | nCIC | RBN | nHDon | nHAcc | TPSA   | AlogP  | Q <sub>m</sub> | E        | μ     | HOMO   | LUMO   | GAP   |
| Construction | Penicillin  | 334.4              | 3    | 4   | 2     | 6     | 112.01 | 1.312  | 0.266          | -1429.14 | 5.335 | -0.237 | -0.018 | 0.219 |
|              | Cefixime    | 453.5              | 3    | 8   | 5     | 12    | 238.05 | -0.195 | 0.336          | -2215.34 | 2.722 | -0.213 | -0.055 | 0.158 |
|              | Ceftriaxone | 552.6              | 4    | 8   | 3     | 15    | 299.72 | -0.861 | 0.336          | -2854.47 | 6.625 | -0.209 | -0.190 | 0.019 |
| Validation   | Cefdinir    | 395.5              | 3    | 5   | 5     | 10    | 211.75 | -0.07  | 0.379          | -1987.88 | 4.172 | -0.224 | -0.087 | 0.137 |
|              | Cefotaxime  | 455.5              | 3    | 8   | 4     | 12    | 227.05 | -0.641 | 0.333          | -2217.04 | 4.781 | -0.222 | -0.076 | 0.145 |
|              | Ceftibuten  | 410.5              | 3    | 6   | 5     | 10    | 216.46 | -0.488 | 0.331          | -2047.17 | 3.736 | -0.225 | -0.078 | 0.148 |
|              | Ceftizoxime | 383.5              | 3    | 5   | 4     | 10    | 200.75 | -0.376 | 0.335          | -1949.77 | 3.521 | -0.221 | -0.076 | 0.145 |

**Abbreviations:**

|                      |                                                     |              |                                     |
|----------------------|-----------------------------------------------------|--------------|-------------------------------------|
| <b>MW</b>            | Molecular weight                                    | <b>nCIC</b>  | Number of rings                     |
| <b>RBN</b>           | Number of rotatable bonds                           | <b>nHDon</b> | Number of hydrogen bond donors      |
| <b>nHAcc</b>         | Number of hydrogen bond acceptors                   | <b>TPSA</b>  | Topological polar surface area      |
| <b>AlogP</b>         | Lipophilicities                                     | <b>E</b>     | The total energy of the molecule    |
| <b>Q<sub>m</sub></b> | Mean absolute charge                                | <b>μ</b>     | Dipole moment                       |
| <b>HOMO</b>          | Highest occupied molecular orbital                  | <b>LUMO</b>  | Lowest unoccupied molecular orbital |
| <b>GAP</b>           | Gap between the energies of the HOMO and LUMO state |              |                                     |



**Table S3.** Number of significant PLS components used in each PCM model.

| Models | Descriptor blocks   | Number of PLS components |                     |
|--------|---------------------|--------------------------|---------------------|
|        |                     | Models without VIP       | Models applying VIP |
| 1      | L                   | 1                        | 1                   |
| 2      | P                   | 1                        | 1-2                 |
| 3      | LxP                 | 1                        | 1-2                 |
| 4      | LxL                 | 2                        | 2                   |
| 5      | PxP                 | 1                        | 1-2                 |
| 6      | L, P                | 4                        | 2                   |
| 7      | L, P, LxP           | 7                        | 4-6                 |
| 8      | L, P, LxL           | 4                        | 3-5                 |
| 9      | L, P, PxP           | 4                        | 4-5                 |
| 10     | L, P, LxP, LxL      | 5                        | 4-5                 |
| 11     | L, P, LxP, PxP      | 5                        | 4-6                 |
| 12     | L, P, LxL, PxP      | 5                        | 4-5                 |
| 13     | L, P, LxP, LxL, PxP | 5                        | 4-5                 |

**Table S4.** Model validation on predictions of pMIC and MIC values of known compounds.

| Patterns | Penicillin  |                              | Cefixime    |                              | Ceftriaxone |                              |
|----------|-------------|------------------------------|-------------|------------------------------|-------------|------------------------------|
|          | pMIC        | MIC,<br>( $\mu\text{g/ml}$ ) | pMIC        | MIC,<br>( $\mu\text{g/ml}$ ) | pMIC        | MIC,<br>( $\mu\text{g/ml}$ ) |
| wt       | 6.746       | 0.06                         | 7.753       | 0.008                        | 7.839       | 0.008                        |
| I        | 6.445       | 0.12                         | 7.452       | 0.016                        | 7.839       | 0.008                        |
| II       | 6.445       | 0.12                         | 7.753       | 0.01                         | 7.839       | 0.008                        |
| III      | 5.825       | 0.50                         | 7.452       | 0.02                         | 7.839       | 0.008                        |
| IV       | 5.223       | 2.00                         | 6.259       | 0.25                         | 6.663       | 0.12                         |
| V        | 5.223       | 2.00                         | 7.179       | 0.03                         | 7.265       | 0.03                         |
| VI       | 6.126       | 0.25                         | 6.878       | 0.06                         | 7.265       | 0.03                         |
| VII      | 5.223       | 2.00                         | 6.577       | 0.12                         | 6.663       | 0.12                         |
| VIII     | 5.825       | 0.50                         | 6.577       | 0.12                         | 7.265       | 0.03                         |
| IX       | 5.524       | 1.00                         | 6.577       | 0.12                         | 6.964       | 0.06                         |
| XI       | 5.524       | 1.00                         | <b>6.73</b> | <b>0.08</b>                  | 6.964       | 0.06                         |
| XII      | 5.524       | 1.00                         | 7.179       | 0.03                         | 7.265       | 0.03                         |
| XIII     | 5.524       | 1.00                         | 6.577       | 0.12                         | 6.964       | 0.06                         |
| XIV      | 6.126       | 0.25                         | 7.753       | 0.008                        | 7.839       | 0.008                        |
| XV       | 6.746       | 0.06                         | 7.753       | 0.008                        | 7.839       | 0.008                        |
| XVI      | <b>5.98</b> | <b>0.35</b>                  | <b>7.03</b> | <b>0.04</b>                  | 7.839       | 0.008                        |
| XVII     | 5.524       | 1.00                         | 6.577       | 0.12                         | 6.663       | 0.12                         |
| XVIII    | 5.223       | 2.00                         | <b>6.47</b> | <b>0.15</b>                  | 6.964       | 0.06                         |
| XIX      | 5.524       | 1.00                         | <b>7.19</b> | <b>0.03</b>                  | 7.839       | 0.01                         |
| XX       | <b>5.69</b> | <b>0.69</b>                  | <b>6.73</b> | <b>0.08</b>                  | 6.964       | 0.06                         |
| XXI      | 5.825       | 0.50                         | 7.179       | 0.03                         | 7.839       | 0.008                        |
| XXII     | 6.746       | 0.06                         | 6.702       | 0.09                         | 7.839       | 0.008                        |
| XXIV     | 5.223       | 2.00                         | 6.577       | 0.12                         | 6.663       | 0.12                         |
| XXV      | <b>5.58</b> | <b>0.89</b>                  | <b>6.63</b> | <b>0.11</b>                  | 6.663       | 0.12                         |
| XXVI     | <b>5.06</b> | <b>2.92</b>                  | 5.958       | 0.50                         | 6.663       | 0.12                         |
| XXVII    | 6.126       | 0.25                         | 7.452       | 0.02                         | 7.839       | 0.01                         |
| XXVIII   | <b>5.78</b> | <b>0.55</b>                  | <b>6.83</b> | <b>0.07</b>                  | 6.663       | 0.12                         |
| XXIX     | <b>5.47</b> | <b>1.13</b>                  | <b>6.52</b> | <b>0.14</b>                  | 6.663       | 0.12                         |
| XXX_nM   | <b>6.02</b> | <b>0.32</b>                  | <b>7.08</b> | <b>0.04</b>                  | 7.839       | 0.01                         |
| XXXIII   | 5.524       | 1.00                         | 6.878       | 0.06                         | 6.964       | 0.06                         |
| XXXVII   | 5.223       | 2.00                         | 6.259       | 0.25                         | 6.663       | 0.12                         |
| X        | 5.223       | 2.00                         | 5.958       | 0.50                         | 6.663       | 0.12                         |
| XXIII    | 6.126       | 0.25                         | <b>7.32</b> | <b>0.02</b>                  | 7.839       | 0.008                        |
| XXX      | <b>5.04</b> | <b>3.05</b>                  | 5.657       | 1.00                         | <b>6.57</b> | <b>0.15</b>                  |
| XXXI     | <b>5.32</b> | <b>1.60</b>                  | 6.259       | 0.25                         | <b>6.84</b> | <b>0.08</b>                  |
| XXXII    | <b>5.07</b> | <b>2.83</b>                  | 5.958       | 0.50                         | <b>6.59</b> | <b>0.14</b>                  |
| XXXIV    | 5.223       | 2.00                         | 6.259       | 0.25                         | 7.265       | 0.03                         |
| CII      | <b>4.88</b> | <b>4.45</b>                  | 5.657       | 1.00                         | 6.043       | 0.50                         |
| CI       | 5.524       | 1.00                         | 5.179       | 3.00                         | 5.566       | 1.50                         |
| IIIg&Iva | 5.524       | 1.00                         | 6.702       | 0.09                         | 7.441       | 0.02                         |
| IIIh     | 5.223       | 2.00                         | 6.259       | 0.25                         | 7.265       | 0.03                         |
| XXXVI    | <b>5.97</b> | <b>0.36</b>                  | <b>7.02</b> | <b>0.04</b>                  | 7.839       | 0.008                        |
| XXXVIII  | 5.524       | 1.00                         | 6.577       | 0.12                         | 7.839       | 0.01                         |

**Table S4.** (Continued).

| Patterns | Penicillin  |                              | Cefixime |                              | Ceftriaxone |                              |
|----------|-------------|------------------------------|----------|------------------------------|-------------|------------------------------|
|          | pMIC        | MIC,<br>( $\mu\text{g/ml}$ ) | pMIC     | MIC,<br>( $\mu\text{g/ml}$ ) | pMIC        | MIC,<br>( $\mu\text{g/ml}$ ) |
| Mosaic2  | 4.922       | 4.00                         | 6.259    | 0.25                         | 6.964       | 0.06                         |
| Mosaic3  | <b>5.24</b> | <b>1.94</b>                  | 6.259    | 0.25                         | <b>6.76</b> | <b>0.10</b>                  |
| Mosaic4  | 5.524       | 1.00                         | 6.259    | 0.25                         | 7.265       | 0.03                         |
| NG-3     | 5.223       | 2.00                         | 5.958    | 0.50                         | 6.964       | 0.06                         |
| 30/02    | 5.223       | 2.00                         | 6.259    | 0.25                         | 6.788       | 0.09                         |
| 35/02    | 5.223       | 2.00                         | 6.259    | 0.25                         | 6.788       | 0.09                         |
| C        | 4.922       | 4.00                         | 4.753    | 8.01                         | 5.441       | 2.00                         |

Experimental susceptibility values are indicated in regular and predicted values are indicated in bold

**Table S5.** Predictions of MIC values of unknown compounds.

| Patterns | Experimental MICs, ( $\mu\text{g/ml}$ ) |                                |                                | Predicted MICs, ( $\mu\text{g/ml}$ ) |                               |                               |
|----------|-----------------------------------------|--------------------------------|--------------------------------|--------------------------------------|-------------------------------|-------------------------------|
|          | Penicillin                              | Cefixime                       | Ceftriaxone                    | Cefotaxime                           | Ceftibuten                    | Ceftizoxime                   |
|          | ( $S \leq 0.06$ , $R \geq 2$ )          | ( $S \leq 0.25$ ) <sup>a</sup> | ( $S \leq 0.25$ ) <sup>a</sup> | ( $S \leq 0.5$ ) <sup>a</sup>        | ( $S \leq 0.5$ ) <sup>a</sup> | ( $S \leq 0.5$ ) <sup>a</sup> |
| wt       | 0.06                                    | 0.008                          | 0.008                          | 0.01                                 | 0.02                          | 0.02                          |
| I        | 0.12                                    | 0.02                           | 0.008                          | 0.01                                 | 0.02                          | 0.02                          |
| II       | 0.12                                    | 0.008                          | 0.008                          | 0.04                                 | 0.05                          | 0.06                          |
| III      | 0.50                                    | 0.02                           | 0.008                          | 0.06                                 | 0.08                          | 0.09                          |
| IV       | 2.00                                    | 0.25                           | 0.12                           | 0.08                                 | 0.11                          | 0.13                          |
| V        | 2.00                                    | 0.03                           | 0.03                           | 0.12                                 | 0.16                          | 0.18                          |
| VI       | 0.25                                    | 0.06                           | 0.03                           | 0.05                                 | 0.07                          | 0.08                          |
| VII      | 2.00                                    | 0.12                           | 0.12                           | 0.12                                 | 0.16                          | 0.18                          |
| VIII     | 0.50                                    | 0.12                           | 0.03                           | 0.16                                 | 0.21                          | 0.23                          |
| IX       | 1.00                                    | 0.12                           | 0.06                           | 0.07                                 | 0.09                          | 0.10                          |
| XI       | 1.00                                    | -                              | 0.06                           | 0.09                                 | 0.12                          | 0.14                          |
| XII      | 1.00                                    | 0.03                           | 0.03                           | 0.10                                 | 0.14                          | 0.16                          |
| XIII     | 1.00                                    | 0.12                           | 0.06                           | 0.15                                 | 0.20                          | 0.23                          |
| XIV      | 0.25                                    | 0.008                          | 0.008                          | 0.02                                 | 0.03                          | 0.03                          |
| XV       | 0.06                                    | 0.008                          | 0.008                          | 0.007                                | 0.009                         | 0.01                          |
| XVI      | -                                       | -                              | 0.008                          | 0.05                                 | 0.06                          | 0.07                          |
| XVII     | 1.00                                    | 0.12                           | 0.12                           | 0.17                                 | 0.23                          | 0.26                          |
| XVIII    | 2.00                                    | -                              | 0.06                           | 0.17                                 | 0.22                          | 0.25                          |
| XIX      | 1.00                                    | -                              | 0.008                          | 0.03                                 | 0.04                          | 0.05                          |
| XX       | -                                       | -                              | 0.06                           | 0.09                                 | 0.12                          | 0.14                          |
| XXI      | 0.50                                    | 0.03                           | 0.008                          | 0.04                                 | 0.05                          | 0.06                          |
| XXII     | 0.06                                    | 0.09                           | 0.008                          | 0.03                                 | 0.04                          | 0.04                          |
| XXIV     | 2.00                                    | 0.12                           | 0.12                           | 0.31                                 | 0.41                          | 0.46                          |
| XXV      | -                                       | -                              | 0.12                           | 0.12                                 | 0.16                          | 0.18                          |
| XXVI     | -                                       | 0.50                           | 0.12                           | 0.39                                 | 0.51                          | 0.58                          |
| XXVII    | 0.25                                    | 0.02                           | 0.008                          | 0.06                                 | 0.08                          | 0.09                          |
| XXVIII   | -                                       | -                              | 0.12                           | 0.07                                 | 0.10                          | 0.11                          |
| XXIX     | -                                       | -                              | 0.12                           | 0.15                                 | 0.20                          | 0.23                          |
| XXX_nM   | -                                       | -                              | 0.008                          | 0.04                                 | 0.06                          | 0.06                          |
| XXXIII   | 1.00                                    | 0.06                           | 0.06                           | 0.13                                 | 0.18                          | 0.20                          |
| XXXVII   | 2.00                                    | 0.25                           | 0.12                           | 0.25                                 | 0.33                          | 0.38                          |
| X        | 2.00                                    | 0.50                           | 0.12                           | 0.29                                 | 0.38                          | 0.43                          |
| XXIII    | 0.25                                    | -                              | 0.008                          | 0.03                                 | 0.03                          | 0.04                          |
| XXX      | -                                       | 1.00                           | -                              | 0.41                                 | 0.55                          | 0.62                          |
| XXXI     | -                                       | 0.25                           | -                              | 0.21                                 | 0.28                          | 0.32                          |
| XXXII    | -                                       | 0.50                           | -                              | 0.39                                 | 0.52                          | 0.59                          |
| XXXIV    | 2.00                                    | 0.25                           | 0.03                           | 0.25                                 | 0.32                          | 0.37                          |
| CII      | -                                       | 1.00                           | 0.50                           | 0.62                                 | 0.82                          | 0.93                          |
| CI       | 1.00                                    | 3.00                           | 1.50                           | 0.84                                 | 1.11                          | 1.25                          |
| IIIg&Iva | 1.00                                    | 0.09                           | 0.02                           | 0.09                                 | 0.11                          | 0.13                          |

**Table S5.** (Continued).

| Patterns | Experimental MICs, ( $\mu\text{g/ml}$ )   |                                          |                                             | Predicted MICs, ( $\mu\text{g/ml}$ )      |            |                                            |
|----------|-------------------------------------------|------------------------------------------|---------------------------------------------|-------------------------------------------|------------|--------------------------------------------|
|          | Penicillin<br>(S $\leq$ 0.06, R $\geq$ 2) | Cefixime<br>(S $\leq$ 0.25) <sup>a</sup> | Ceftriaxone<br>(S $\leq$ 0.25) <sup>a</sup> | Cefotaxime<br>(S $\leq$ 0.5) <sup>a</sup> | Ceftibuten | Ceftizoxime<br>(S $\leq$ 0.5) <sup>a</sup> |
| IIIh     | 2.00                                      | 0.25                                     | 0.03                                        | 0.24                                      | 0.31       | 0.36                                       |
| XXXVI    | -                                         | -                                        | 0.008                                       | 0.16                                      | 0.21       | 0.24                                       |
| XXXVIII  | 1.00                                      | 0.12                                     | 0.008                                       | 0.08                                      | 0.10       | 0.11                                       |
| Mosaic2  | 4.00                                      | 0.25                                     | 0.06                                        | 0.28                                      | 0.37       | 0.42                                       |
| Mosaic3  | -                                         | 0.25                                     | -                                           | 0.27                                      | 0.35       | 0.40                                       |
| Mosaic4  | 1.00                                      | 0.25                                     | 0.03                                        | 0.13                                      | 0.17       | 0.20                                       |
| NG-3     | 2.00                                      | 0.50                                     | 0.06                                        | 0.29                                      | 0.39       | 0.44                                       |
| 30/02    | 2.00                                      | 0.25                                     | 0.09                                        | 0.27                                      | 0.36       | 0.40                                       |
| 35/02    | 2.00                                      | 0.25                                     | 0.09                                        | 0.27                                      | 0.36       | 0.41                                       |
| C        | 4.00                                      | 8.01                                     | 2.00                                        | 3.58                                      | 4.72       | 5.32                                       |

<sup>a</sup> Interpretation criteria (S, susceptible; R, resistant) are according to the Clinical Laboratory and Standards Institute (CLSI)

**Reference:**

Clinical and Laboratory Standards Institute (2014). Performance standards for antimicrobial susceptibility testing, 24<sup>th</sup> informational supplement. CLSI document M100-S24. Clinical and Laboratory Standards Institute, Wayne, PA.

**Figure S1.** Alignment of 50 penicillin-binding protein 2 sequences used in the study. Amino acid numbering with respect to that of the wild-type PBP 2 sequence (GenBank accession no. M32091). Highlighted positions indicate selected amino acid positions for investigation in this study.

|                            | ..... ..... | ..... ..... | ..... ..... | ..... ..... | ..... ..... | ..... ..... |
|----------------------------|-------------|-------------|-------------|-------------|-------------|-------------|
|                            | 10          | 20          | 30          | 40          | 50          |             |
| <b>wt</b>                  | MLIKSEYKPR  | MLPKEEQVKK  | PMTSNGRISF  | VLMAVAFLFA  | CLIAAGLYLQ  |             |
| <b>patternI</b>            | MLIKSEYKPR  | MLPKEEQVKK  | PMTSNGRISF  | VLMAVAFLFA  | CLIAAGLYLQ  |             |
| <b>patternII</b>           | MLIKSEYKPR  | MLPKEEQVKK  | PMTSNGRISF  | VLMAVAFLFA  | CLIAAGLYLQ  |             |
| <b>patternIII</b>          | MLIKSEYKPR  | MLPKEEQVKK  | PMTSNGRISF  | VLMAVAFLFA  | CLIAAGLYLQ  |             |
| <b>patternIV</b>           | MLIKSEYKPR  | MLPKEEQVKK  | PMTSNGRISF  | VLMAVAFLFA  | CLIAAGLYLQ  |             |
| <b>patternV</b>            | MLIKSEYKPR  | MLPKEEQVKK  | PMTSNGRISF  | VLMAVAFLFA  | CLIAAGLYLQ  |             |
| <b>patternVI</b>           | MLIKSEYKPR  | MLPKEEQVKK  | PMTSNGRISF  | VLMAVAFLFA  | CLIAAGLYLQ  |             |
| <b>patternVII</b>          | MLIKSEYKPR  | MLPKEEQVKK  | PMTSNGRISF  | VLMAVAFLFA  | CLIAAGLYLQ  |             |
| <b>patternVIII</b>         | MLIKSEYKPR  | MLPKEEQVKK  | PMTSNGRISF  | VLMAVAFLFA  | CLIAAGLYLQ  |             |
| <b>patternIX</b>           | MLIKSEYKPR  | MLPKEEQVKK  | PMTSNGRISF  | VLMAVAFLFA  | CLIAAGLYLQ  |             |
| <b>patternXI</b>           | MLIKSEYKPR  | MLPKEEQVKK  | PMTSNGRISF  | VLMAVAFLFA  | CLIAAGLYLQ  |             |
| <b>patternXII</b>          | MLIKSEYKPR  | MLPKEEQVKK  | PMTSNGRISF  | VLMAVAFLFA  | CLIAAGLYLQ  |             |
| <b>patternXIII</b>         | MLIKSEYKPR  | MLPKEEQVKK  | PMTSNGRISF  | VLMAVAFLFA  | CLIAAGLYLQ  |             |
| <b>patternXIV</b>          | MLIKSEYKPR  | MLPKEEQVKK  | PMTSNGRISF  | VLMAVAFLFA  | CLIAAGLYLQ  |             |
| <b>patternXV</b>           | MLIKSEYKPR  | MLPKEEQVKK  | PMTSNGRISF  | VLMAVAFLFA  | CLIAAGLYLQ  |             |
| <b>patternXVI</b>          | MLIKSEYKPR  | MLPKEEQVKK  | PMTSNGRISF  | VLMAVAFLFA  | CLIAAGLYLQ  |             |
| <b>patternXVII</b>         | MLIKSEYKPR  | MLPKEEQVKK  | PMTSNGRISF  | VLMAVAFLFA  | CLIAAGLYLQ  |             |
| <b>patternXVIII</b>        | MLIKSEYKPR  | MLPKEEQVKK  | PMTSNGRISF  | VLMAVAFLFA  | CLIAAGLYLQ  |             |
| <b>patternXIX</b>          | MLIKSEYKPR  | MLPKEEQVKK  | PMTSNGRISF  | VLMAVAFLFA  | CLIAAGLYLQ  |             |
| <b>patternXX</b>           | MLIKSEYKPR  | MLPKEEQVKK  | PMTSNGRISF  | VLMAVAFLFA  | CLIAAGLYLQ  |             |
| <b>patternXXI</b>          | MLIKSEYKPR  | MLPKEEQVKK  | PMTSNGRISF  | VLMAVAFLFA  | CLIAAGLYLQ  |             |
| <b>patternXXII</b>         | MLIKSEYKPR  | MLPKEEQVKK  | PMTSNGRISF  | VLMAVAFLFA  | CLIAAGLYLQ  |             |
| <b>patternXXIV</b>         | MLIKSEYKPR  | MLPKEEQVKK  | PMTSNGRISF  | VLMAVAFLFA  | CLIAAGLYLQ  |             |
| <b>patternXXV</b>          | MLIKSEYKPR  | MLPKEEQVKK  | PMTSNGRISF  | VLMAVAFLFA  | CLIAAGLYLQ  |             |
| <b>patternXXVI</b>         | MLIKSEYKPR  | MLPKEEQVKK  | PMTSNGRISF  | VLMAVAFLFA  | CLIAAGLYLQ  |             |
| <b>patternXXVII</b>        | MLIKSEYKPR  | MLPKEEQVKK  | PMTSNGRISF  | VLMAVAFLFA  | CLIAAGLYLQ  |             |
| <b>patternXXVIII</b>       | MLIKSEYKPR  | MLPKEEQVKK  | PMTSNGRISF  | VLMAVAFLFA  | CLIAAGLYLQ  |             |
| <b>patternXXIX</b>         | MLIKSEYKPR  | MLPKEEQVKK  | PMTSNGRISF  | VLMAVAFLFA  | CLIAAGLYLQ  |             |
| <b>patternXXX_nM</b>       | MLIKSEYKPR  | MLPKEEQVKK  | PMTSNGRISF  | VLMAVAFLFA  | CLIAAGLYLQ  |             |
| <b>patternXXXIII</b>       | MLIKSEYKPR  | MLPKEEQVKK  | PMTSNGRISF  | VLMAVAFLFA  | CLIAAGLYLQ  |             |
| <b>patternXXXVII</b>       | MLIKSEYKPR  | MLPKEEQVKK  | PMTSNGRISF  | VLMAVAFLFA  | CLIAAGLYLQ  |             |
| <b>patternX</b>            | MLIKSEYKPR  | MLPKEEQVKK  | PMTSNGRISF  | VLMAVAFLFA  | CLIAAGLYLQ  |             |
| <b>patternXXIII</b>        | MLIKSEYKPR  | MLPKEEQVKK  | PMTSNGRISF  | VLMAVAFLFA  | CLIAAGLYLQ  |             |
| <b>patternXXX</b>          | MLIKSEYKPR  | MLPKEEQVKK  | PMTSNGRISF  | VLMAVAFLFA  | CLIAAGLYLQ  |             |
| <b>patternXXXI</b>         | MLIKSEYKPR  | MLPKEEQVKK  | PMTSNGRISF  | VLMAVAFLFA  | CLIAAGLYLQ  |             |
| <b>patternXXXII</b>        | MLIKSEYKPR  | MLPKEEQVKK  | PMTSNGRISF  | VLMAVAFLFA  | CLIAAGLYLQ  |             |
| <b>patternXXXIV</b>        | MLIKSEYKPR  | MLPKEEQVKK  | PMTSNGRISF  | VLMAVAFLFA  | CLIAAGLYLQ  |             |
| <b>patternCII</b>          | MLIKSEYKPR  | MLPKEEQVKK  | PMTSNGRISF  | VLMAVAFLFA  | CLIAAGLYLQ  |             |
| <b>patternCI</b>           | MLIKSEYKPR  | MLPKEEQVKK  | PMTSNGRISF  | VLMAVAFLFA  | CLIAAGLYLQ  |             |
| <b>patternIIlg&amp;Iva</b> | MLIKSEYKPR  | MLPKEEQVKK  | PMTSNGRISF  | VLMAVAFLFA  | CLIAAGLYLQ  |             |
| <b>patternIIh</b>          | MLIKSEYKPR  | MLPKEEQVKK  | PMTSNGRISF  | VLMAVAFLFA  | CLIAAGLYLQ  |             |
| <b>patternXXXVI</b>        | MLIKSEYKPR  | MLPKEEQVKK  | PMTSNGRISF  | VLMAVAFLFA  | CLIAAGLYLQ  |             |
| <b>patternXXXVIII</b>      | MLIKSEYKPR  | MLPKEEQVKK  | PMTSNGRISF  | VLMAVAFLFA  | GLIAAGLYLQ  |             |
| <b>mosaic2</b>             | MLIKSEYKPR  | MLPKEEQVKK  | PMTSNGRISF  | VLMAVAFLFA  | CLIAAGLYLQ  |             |
| <b>mosaic3</b>             | MLIKSEYKPR  | MLPKEEQVKK  | PMTSNGRISF  | VLMAVAFLFA  | CLIAAGLYLQ  |             |
| <b>mosaic4</b>             | MLIKSEYKPR  | MLPKEEQVKK  | PMTSNGRISF  | VLMAVAFLFA  | CLIAAGLYLQ  |             |
| <b>NG-3</b>                | MLIKSEYKPR  | MLPKEEQVKK  | PMTSNGRISF  | VLMAVAFLFA  | CLIAAGLYLQ  |             |
| <b>30/02</b>               | MLIKSEYKPR  | MLPKEEQVKK  | PMTSNGRISF  | VLMAVAFLFA  | CLIAAGLYLQ  |             |
| <b>35/02</b>               | MLIKSEYKPR  | MLPKEEQVKK  | PMTSNGRISF  | VLMAVAFLFA  | CLIAAGLYLQ  |             |
| <b>patternC</b>            | MLIKSEYKPR  | MLPKEEQVKK  | PMTSNGRISF  | VLMAVAFLFA  | CLIAAGLYLQ  |             |
| <b>Consistency</b>         | *****       | *****       | *****       | ****9*****  | 9*****      |             |

|                            | 60         | 70         | 80         | 90         | 100        |
|----------------------------|------------|------------|------------|------------|------------|
| <b>wt</b>                  | TVTYNFLKEQ | GDNRIVRTQA | LPATRGTVSD | RNGAVLALSA | PTESLFAVPK |
| <b>patternI</b>            | TVTYNFLKEQ | GDNRIVRTQA | LPATRGTVSD | RNGAVLALSA | PTESLFAVPK |
| <b>patternII</b>           | TVTYNFLKEQ | GDNRIVRTQA | LPATRGTVSD | RNGAVLALSA | PTESLFAVPK |
| <b>patternIII</b>          | TVTYNFLKEQ | GDNRIVRTQA | LPATRGTVSD | RNGAVLALSA | PTESLFAVPK |
| <b>patternIV</b>           | TVTYNFLKEQ | GDNRIVRTQA | LPATRGTVSD | RNGAVLALSA | PTESLFAVPK |
| <b>patternV</b>            | TVTYNFLKEQ | GDNRIVRTQA | LPATRGTVSD | RNGAVLALSA | PTESLFAVPK |
| <b>patternVI</b>           | TVTYNFLKEQ | GDNRIVRTQA | LPATRGTVSD | RNGAVLALSA | PTESLFAVPK |
| <b>patternVII</b>          | TVTYNFLKEQ | GDNRIVRTQA | LPATRGTVSD | RNGAVLALSA | PTESLFAVPK |
| <b>patternVIII</b>         | TVTYNFLKEQ | GDNRIVRTQA | LPATRGTVSD | RNGAVLALSA | PTESLFAVPK |
| <b>patternIX</b>           | TVTYNFLKEQ | GDNRIVRTQA | LPATRGTVSD | RNGAVLALSA | PTESLFAVPK |
| <b>patternXI</b>           | TVTYNFLKEQ | GDNRIVRTQA | LPATRGTVSD | RNGAVLALSA | PTESLFAVPK |
| <b>patternXII</b>          | TVTYNFLKEQ | GDNRIVRTQA | LPATRGTVSD | RNGAVLALSA | PTESLFAVPK |
| <b>patternXIII</b>         | TVTYNFLKEQ | GDNRIVRTQA | LPATRGTVSD | RNGAVLALSA | PTESLFAVPK |
| <b>patternXIV</b>          | TVTYNFLKEQ | GDNRIVRTQA | LPATRGTVSD | RNGAVLALSA | PTESLFAVPK |
| <b>patternXV</b>           | TVTYNFLKEQ | GDNRIVRTQA | LPATRGTVSD | RNGAVLALSA | PTESLFAVPK |
| <b>patternXVI</b>          | TVTYNFLKEQ | GDNRIVRTQA | LPATRGTVSD | RNGAVLALSA | PTESLFAVPK |
| <b>patternXVII</b>         | TVTYNFLKEQ | GDNRIVRTQA | LPATRGTVSD | RNGAVLALSA | PTESLFAVPK |
| <b>patternXVIII</b>        | TVTYNFLKEQ | GDNRIVRTQA | LPATRGTVSD | RNGAVLALSA | PTESLFAVPK |
| <b>patternXIX</b>          | TVTYNFLKEQ | GDNRIVRTQA | LPATRGTVSD | RNGAVLALSA | PTESLFAVPK |
| <b>patternXX</b>           | TVTYNFLKEQ | GDNRIVRTQA | LPATRGTVSD | RNGAVLALSA | PTESLFAVPK |
| <b>patternXXI</b>          | TVTYNFLKEQ | GDNRIVRTQA | LPATRGTVSD | RNGAVLALSA | PTESLFAVPK |
| <b>patternXXII</b>         | TVTYNFLKEQ | GDNRIVRTQA | LPATRGTVSD | RNGAVLALSA | PTESLFAVPK |
| <b>patternXXIV</b>         | TVTYNFLKEQ | GDNRIVRTQA | LPATRGTVSD | RNGAVLALSA | PTESLFAVPK |
| <b>patternXXV</b>          | TVTYNFLKEQ | GDNRIVRTQA | LPATRGTVSD | RNGAVLALSA | PTESLFAVPK |
| <b>patternXXVI</b>         | TVTYNFLKEQ | GDNRIVRTQA | LPATRGTVSD | RNGAVLALSA | PTESLFAVPK |
| <b>patternXXVII</b>        | TVTYNFLKEQ | GDNRIVRTQA | LPATRGTVSD | RNGAVLALSA | PTESLFAVPK |
| <b>patternXXVIII</b>       | TVTYNFLKEQ | GDNRIVRTQA | LPATRGTVSD | RNGAVLALSA | PTESLFAVPK |
| <b>patternXXIX</b>         | TVTYNFLKEQ | GDNRIVRTQA | LPATRGTVSD | RNGAVLALSA | PTESLFAVPK |
| <b>patternXXX_nM</b>       | TVTYNFLKEQ | GDNRIVRTQA | LPATRGTVSD | RNGAVLALSA | PTESLFAVPK |
| <b>patternXXXIII</b>       | TVTYNFLKEQ | GDNRIVRTQA | LPATRGTVSD | RNGAVLALSA | PTESLFAVPK |
| <b>patternXXXVII</b>       | TVTYNFLKEQ | GDNRIVRTQA | LPATRGTVSD | RNGAVLALSA | PTESLFAVPK |
| <b>patternX</b>            | TVTYNFLKEQ | GDNRIVRTQA | LPATRGTVSD | RNGAVLALSA | PTESLFAVPK |
| <b>patternXXIII</b>        | TVTYNFLKEQ | GDNRIVRTQA | LPATRGTVSD | RNGAVLALSA | PTESLFAVPK |
| <b>patternXXX</b>          | TVTYNFLKEQ | GDNRIVRTQA | LPATRGTVSD | RNGAVLALSA | PTESLFAVPK |
| <b>patternXXXI</b>         | TVTYNFLKEQ | GDNRIVRTQA | LPATRGTVSD | RNGAVLALSA | PTESLFAVPK |
| <b>patternXXXII</b>        | TVTYNFLKEQ | GDNRIVRTQA | LPATRGTVSD | RNGAVLALSA | PTESLFAVPK |
| <b>patternXXXIV</b>        | TVTYNFLKEQ | GDNRIVRTQA | LPATRGTVSD | RNGAVLALSA | PTESLFAVPK |
| <b>patternCII</b>          | TVTYNFLKEQ | GDNRIVRTQA | LPATRGTVSD | RNGAVLALSA | PTESLFAVPK |
| <b>patternCI</b>           | TVTYNFLKEQ | GDNRIVRTQA | LPATRGTVSD | RNGAVLALSA | PTESLFAVPK |
| <b>patternIIIg&amp;Iva</b> | TVTYNFLKEQ | GDNRIVRTQA | LPATRGTVSD | RNGAVLALSA | PTESLFAVPK |
| <b>patternIIIf</b>         | TVTYNFLKEQ | GDNRIVRTQA | LPATRGTVSD | RNGAVLALSA | PTESLFAVPK |
| <b>patternXXXVI</b>        | TVTYNFLKEQ | GDNRIVRTQA | LPATRGTVSD | RNGAVLALSA | PTESLFAVPK |
| <b>patternXXXVIII</b>      | TVTYNFLKEQ | GDNRIVRTQT | LPATRGTVSD | RNGAVLALSA | PTESLFAVPK |
| <b>mosaic2</b>             | TVTYNFLKEQ | GDNRIVRTQA | LPATRGTVSD | RNGAVLALSA | PTESLFAVPK |
| <b>mosaic3</b>             | TVTYNFLKEQ | GDNRIVRTQA | LPATRGTVSD | RNGAVLALSA | PTESLFAVPK |
| <b>mosaic4</b>             | TVTYNFLKEQ | GDNRIVRTQA | LPATRGTVSD | RNGAVLALSA | PTESLFAVPK |
| <b>NG-3</b>                | TVTYNFLKEQ | GDNRIVRTQA | LPATRGTVSD | RNGAVLALSA | PTESLFAVPK |
| <b>30/02</b>               | TVTYNFLKEQ | GDNRIVRTQA | LPATRGTVSD | RNGAVLALSA | PTESLFAVPK |
| <b>35/02</b>               | TVTYNFLKEQ | GDNRIVRTQA | LPATRGTVSD | RNGAVLALSA | PTESLFAVPK |
| <b>patternC</b>            | TVTYNFLKEQ | GDNRIVRTQA | LPATRGTVSD | RNGAVLALSA | PTESLFAVPK |
| <b>Consistency</b>         | *****      | *****9     | *****      | **9*****   | *****9     |

|                 | 110        | 120        | 130        | 140        | 150        |
|-----------------|------------|------------|------------|------------|------------|
| wt              | DMKEMPSAAQ | LERLSELVDV | PVDVLRNKLE | QKGKSFIWIK | RQLDPKVAEE |
| patternI        | DMKEMPSAAQ | LERLSELVDV | PVDVLRNKLE | QKGKSFIWIK | RQLDPKVAEE |
| patternII       | DMKEMPSAAQ | LERLSELVDV | PVDVLRNKLE | QKGKSFIWIK | RQLDPKVAEE |
| patternIII      | DMKEMPSAAQ | LERLSELVDV | PVDVLRNKLE | QKGKSFIWIK | RQLDPKVAEE |
| patternIV       | DMKEMPSAAQ | LERLSELVDV | PVDVLRNKLE | QKGKSFIWIK | RQLDPKVAEE |
| patternV        | DMKEMPSAAQ | LERLSELVDV | PVDVLRNKLE | QKGKSFIWIK | RQLDPKVAEE |
| patternVI       | DMKEMPSAAQ | LERLSELVDV | PVDVLRNKLE | QKGKSFIWIK | RQLDPKVAEE |
| patternVII      | DMKEMPSAAQ | LERLSELVDV | PVDVLRNKLE | QKGKSFIWIK | RQLDPKVAEE |
| patternVIII     | DMKEMPSAAQ | LERLSELVDV | PVDVLRNKLE | QKGKSFIWIK | RQLDPKVAEE |
| patternIX       | DMKEMPSAAQ | LERLSELVDV | PVDVLRNKLE | QKGKSFIWIK | RQLDPKVAEE |
| patternXI       | DMKEMPSAAQ | LERLSELVDV | PVDVLRNKLE | QKGKSFIWIK | RQLDPKVAEE |
| patternXII      | DMKEMPSAAQ | LERLSELVDV | PVDVLRNKLE | QKGKSFIWIK | RQLDPKVAEE |
| patternXIII     | DMKEMPSAAQ | LERLSELVDV | PVDVLRNKLE | QKGKSFIWIK | RQLDPKVAEE |
| patternXIV      | DMKEMPSAAQ | LERLSELVDV | PVDVLRNKLE | QKGKSFIWIK | RQLDPKVAEE |
| patternXV       | DMKEMPSAAQ | LERLSELVDV | PVDVLRNKLE | QKGKSFIWIK | RQLDPKVAEE |
| patternXVI      | DMKEMPSAAQ | LERLSELVDV | PVDVLRNKLE | QKGKSFIWIK | RQLDPKVAEE |
| patternXVII     | DMKEMPSAAQ | LERLSELVDV | PVDVLRNKLE | QKGKSFIWIK | RQLDPKVAEE |
| patternXVIII    | DMKEMPSAAQ | LERLSELVDV | PVDVLRNKLE | QKGKSFIWIK | RQLDPKVAEE |
| patternXIX      | DMKEMPSAAQ | LERLSELVDV | PVDVLRNKLE | QKGKSFIWIK | RQLDPKVAEE |
| patternXX       | DMKEMPSAAQ | LERLSELVDV | PVDVLRNKLE | QKGKSFIWIK | RQLDPKVAEE |
| patternXXI      | DMKEMPSAAQ | LERLSELVDV | PVDVLRNKLE | QKGKSFIWIK | RQLDPKVAEE |
| patternXXII     | DMKEMPSAAQ | LERLSELVDV | PVDVLRNKLE | QKGKSFIWIK | RQLDPKVAEE |
| patternXXIV     | DMKEMPSAAQ | LERLSELVDV | PVDVLRNKLE | QKGKSFIWIK | RQLDPKVAEE |
| patternXXV      | DMKEMPSAAQ | LERLSELVDV | PVDVLRNKLE | QKGKSFIWIK | RQLDPKVAEE |
| patternXXVI     | DMKEMPSAAQ | LERLSELVDV | PVDVLRNKLE | QKGKSFIWIK | RQLDPKVAEE |
| patternXXVII    | DMKEMPSAAQ | LERLSELVDV | PVDVLRNKLE | QKGKSFIWIK | RQLDPKVAEE |
| patternXXVIII   | DMKEMPSAAQ | LERLSELVDV | PVDVLRNKLE | QKGKSFIWIK | RQLDPKVAEE |
| patternXXIX     | DMKEMPSAAQ | LERLSELVDV | PVDVLRNKLE | QKGKSFIWIK | RQLDPKVAEE |
| patternXXX_nM   | DMKEMPSAAQ | LERLSELVDV | PVDVLRNKLE | QKGKSFIWIK | RQLDPKVAEE |
| patternXXXIII   | DMKEMPSAAQ | LERLSELVDV | PVDVLRNKLE | QKGKSFIWIK | RQLDPKVAEE |
| patternXXXVII   | DMKEMPSAAQ | LERLSELVDV | PVDVLRNKLE | QKGKSFIWIK | RQLDPKVAEE |
| patternX        | EMKEMPSAAQ | LERLSELVDV | PVDVLRNKLE | QKGKSFIWIK | RQLDPKVAEE |
| patternXXIII    | DMKEMPSAAQ | LERLSELVDV | PVDVLRNKLE | QKGKSFIWIK | RQLDPKVAEE |
| patternXXX      | EMKEMPSAAQ | LERLSELVDV | PVDVLRNKLE | QKGKSFIWIK | RQLDPKVAEE |
| patternXXXI     | EMKEMPSAAQ | LERLSELVDV | PVDVLRNKLE | QKGKSFIWIK | RQLDPKVAEE |
| patternXXXII    | EMKEMPSAAQ | LERLSELVDV | PVDVLRNKLE | QKGKSFIWIK | RQLDPKVAEE |
| patternXXXIV    | EMKEMPSAAQ | LERLSELVDV | PVDVLRNKLE | QKGKSFIWIK | RQLDPKVAEE |
| patternCII      | EMKEMPSAAQ | LERLSELVDV | PVDVLRNKLE | QKGKSFIWIK | RQLDPKVAEE |
| patternCI       | EMKEMPSAAQ | LERLSELVDV | PVDVLRNKLE | QKGKSFIWIK | RQLDPKVAEE |
| patternIIIg&Iva | EMKEMPSAAQ | LERLSELVDV | PVDVLRNKLE | QKGKSFIWIK | RQLDPKVAEE |
| patternIIHh     | EMKEMPSAAQ | LERLSELVDV | PVDVLRNKLE | QKGKSFIWIK | RQLDPKVAEE |
| patternXXXVI    | DMKEMPSAAQ | LERLSELVDV | PVDVLRNKLE | QKGKSFIWIK | RQLDPKVAEE |
| patternXXXVIII  | EMKEMPSAAQ | LERLSELVDV | PVDVLRNKLE | QKGKSFIWIK | RQLDPKVAEE |
| mosaic2         | DMKEMPSAAQ | LERLSELVDV | PVDVLRNKLE | QKGKSFIWIK | RQLDPKVAEE |
| mosaic3         | EMKEMPSAAQ | LERLSELVDV | PVDVLRNKLE | QKGKSFIWIK | RQLDPKVAEE |
| mosaic4         | EMKEMPSAAQ | LERLSELVDV | PVDVLRNKLE | QKGKSFIWIK | RQLDPKVAEE |
| NG-3            | EMKEMPSAAQ | LERLSELVDV | PVDVLRNKLE | QKGKSFIWIK | RQLDPKVAEE |
| 30/02           | EMKEMPSAAQ | LERLSELVDV | PVDVLRNKLE | QKGKSFIWIK | RQLDPKVAEE |
| 35/02           | EMKEMPSAAQ | LERLSELVDV | PVDVLRNKLE | QKGKSFIWIK | RQLDPKVAEE |
| patternC        | EMKEMPSAAQ | LERLSELVDV | PVDVLRNKLE | QKGKSFIWIK | RQLDPKVAEE |
| Consistency     | 8*****     | *****      | *****      | *****      | ***9*****  |



|                  | 160        | 170        | 180        | 190        | 200        |
|------------------|------------|------------|------------|------------|------------|
| wt               | VKALGLENFV | FEKELKRHYP | MGNLFAHVIG | FTDIDGKGQE | GLELSLEDSL |
| patternI         | VKALGLENFV | FEKELKRHYP | MGNLFAHVIG | FTDIDGKGQE | GLELSLEDSL |
| patternII        | VKALGLENFV | FEKELKRHYP | MGNLFAHVIG | FTDIDGKGQE | GLELSLEDSL |
| patternIII       | VKALGLENFV | FEKELKRHYP | MGNLFAHVIG | FTDIDGKGQE | GLELSLEDSL |
| patternIV        | VKALGLENFV | FEKELKRHYP | MGNLFAHVIG | FTDIDGKGQE | GLELSLEDSL |
| patternV         | VKALGLENFV | FEKELKRHYP | MGNLFAHVIG | FTDIDGKGQE | GLELSLEDSL |
| patternVI        | VKALGLENFV | FEKELKRHYP | MGNLFAHVIG | FTDIDGKGQE | GLELSLEDSL |
| patternVII       | VKALGLENFV | FEKELKRHYP | MGNLFAHVIG | FTDIDGKGQE | GLELSLEDSL |
| patternVIII      | VKALGLENFV | FEKELKRHYP | MGNLFAHVIG | FTDIDGKGQE | GLELSLEDSL |
| patternIX        | VKALGLENFV | FEKELKRHYP | MGNLFAHVIG | FTDIDGKGQE | GLELSLEDSL |
| patternXI        | VKALGLENFV | FEKELKRHYP | MGNLFAHVIG | FTDIDGKGQE | GLELSLEDSL |
| patternXII       | VKALGLENFV | FEKELKRHYP | MGNLFAHVIG | FTDIDGKGQE | GLELSLEDSL |
| patternXIII      | VKALGLENFV | FEKELKRHYP | MGNLFAHVIG | FTDIDGKGQE | GLELSLEDSL |
| patternXIV       | VKALGLENFV | FEKELKRHYP | MGNLFAHVIG | FTDIDGKGQE | GLELSLEDSL |
| patternXV        | VKALGLENFV | FEKELKRHYP | MGNLFAHVIG | FTDIDGKGQE | GLELSLEDSL |
| patternXVI       | VKALGLENFV | FEKELKRHYP | MGNLFAHVIG | FTDIDGKGQE | GLELSLEDSL |
| patternXVII      | VKALGLENFV | FEKELKRHYP | MGNLFAHVIG | FTDIDGKGQE | GLELSLEDSL |
| patternXVIII     | VKALGLENFV | FEKELKRHYP | MGNLFAHVIG | FTDIDGKGQE | GLELSLEDSL |
| patternXIX       | VKALGLENFV | FEKELKRHYP | MGNLFAHVIG | FTDIDGKGQE | GLELSLEDSL |
| patternXX        | VKALGLENFV | FEKELKRHYP | MGNLFAHVIG | FTDIDGKGQE | GLELSLEDSL |
| patternXXI       | VKALGLENFV | FEKELKRHYP | MGNLFAHVIG | FTDIDGKGQE | GLELSLEDSL |
| patternXXII      | VKALGLENFV | FEKELKRHYP | MGNLFAHVIG | FTDIDGKGQE | GLELSLEDSL |
| patternXXIV      | VKALGLENFV | FEKELKRHYP | MGNLFAHVIG | FTDIDGKGQE | GLELSLEDSL |
| patternXXV       | VKALGLENFV | FEKELKRHYP | MGNLFAHVIG | FTDIDGKGQE | GLELSLEDSL |
| patternXXVI      | VKALGLENFV | FEKELKRHYP | MGNLFAHVIG | FTDIDGKGQE | GLELSLEDSL |
| patternXXVII     | VKALGLENFV | FEKELKRHYP | MGNLFAHVIG | FTDIDGKGQE | GLELSLEDSL |
| patternXXVIII    | VKALGLENFV | FEKELKRHYP | MGNLFAHVIG | FTDIDGKGQE | GLELSLEDSL |
| patternXXX_nM    | VKALGLENFV | FEKELKRHYP | MGNLFAHVIG | FTDIDGKGQE | GLELSLEDSL |
| patternXXXIII    | VKALGLENFV | FEKELKRHYP | MGNLFAHVIG | FTDIDGKGQE | GLELSLEDSL |
| patternXXXVII    | VKALGLENFV | FEKELKRHYP | MGNLFAHVIG | FTDIDGKGQE | GLELSLEDSL |
| patternX         | VKALGLENFA | FEKELKRHYP | MGSLFAHVIG | FTDIDGKGQE | GLELSLEDSL |
| patternXXIII     | VKALGLENFV | FEKELKRHYP | MGNLFAHVIG | FTDIDGKGQE | GLELSLEDSL |
| patternXXX       | VKALGLENFA | FEKELKRHYP | MGSLFAHVIG | FTDIDGKGQE | GLELSLEDSL |
| patternXXXI      | VKALGLENFA | FEKELKRHYP | MGSLFAHVIG | FTDIDGKGQE | GLELSLEDSL |
| patternXXXII     | VKALGLENFA | FEKELKRHYP | MGSLFAHVIG | FTDIDGKGQE | GLELSLEDSL |
| patternXXXIV     | VKALGLENFA | FEKELKRHYP | MGSLFAHVIG | FTDIDGKGQE | GLELSLEDSL |
| patternCII       | VKALGLENFA | FEKELKRHYP | MGSLFAHVIG | FTDIDGKGQE | GLELSLEDSL |
| patternCI        | VKALGLENFA | FEKELKRHYP | MGSLFAHVIG | FTDIDGKGQE | GLELSLEDSL |
| patternII Ig&Iva | VKALGLENFA | FEKELKRHYP | MGSLFAHVIG | FTDIDGKGQE | GLELSLEDSL |
| patternIIIh      | VKALGLENFA | FEKELKRHYP | MGSLFAHVIG | FTDIDGKGQE | GLELSLEDSL |
| patternXXXVI     | VKALGLENFV | FEKELKRHYP | MGNLFAHVIG | FTDIDGKGQE | GLELSLEDSL |
| patternXXXVIII   | VKALGLENFV | FEKELKRHYP | MGNLFAHVIG | FTDIDGKGQE | GLELSLEDSL |
| mosaic2          | VKALGLENFA | FEKELKRHYP | MGSLFAHVIG | FTDIDGKGQE | GLELSLEDSL |
| mosaic3          | VKALGLENFA | FEKELKRHYP | MGSLFAHVIG | FTDIDGKGQE | GLELSLEDSL |
| mosaic4          | VKALGLENFA | FEKELKRHYP | MGSLFAHVIG | FTDIDGKGQE | GLELSLEDSL |
| NG-3             | VKALGLENFA | FEKELKRHYP | MGSLFAHVIG | FTDIDGKGQE | GLELSLEDSL |
| 30/02            | VKALGLENFA | FEKELKRHYP | MGSLFAHVIG | FTDIDGKGQE | GLELSLEDSL |
| 35/02            | VKALGLENFA | FEKELKRHYP | MGNLFAHVIG | FTDIDGKGQE | GLELSLEDSL |
| patternC         | VKALGLENFA | FEKELKRHYP | MGSLFAHVIG | FTDIDGKGQE | GLELSLEDSL |
| Consistency      | *****7     | *****8     | *****8     | *****8     | *****8     |

```

      ....|....| ....|....| ....|....| ....|....| ....|....|
      210      220      230      240      250
wt      YGEDGAEVVL RDROGNIVDS LDSPRNKAPQ NGKDIIISLD QRIQTLAYEE
patternI      YGEDGAEVVL RDROGNIVDS LDSPRNKAPQ NGKDIIISLD QRIQTLAYEE
patternII     YGEDGAEVVL RDROGNIVDS LDSPRNKAPQ NGKDIIISLD QRIQTLAYEE
patternIII    YGEDGAEVVL RDROGNIVDS LDSPRNKAPQ NGKDIIISLD QRIQTLAYEE
patternIV     YGEDGAEVVL RDROGNIVDS LDSPRNKAPQ NGKDIIISLD QRIQTLAYEE
patternV      YGEDGAEVVL RDROGNIVDS LDSPRNKAPQ NGKDIIISLD QRIQTLAYEE
patternVI     YGEDGAEVVL RDROGNIVDS LDSPRNKAPQ NGKDIIISLD QRIQTLAYEE
patternVII    YGEDGAEVVL RDROGNIVDS LDSPRNKAPQ NGKDIIISLD QRIQTLAYEE
patternVIII   YGEDGAEVVL RDROGNIVDS LDSPRNKAPQ NGKDIIISLD QRIQTLAYEE
patternIX     YGEDGAEVVL RDROGNIVDS LDSPRNKAPQ NGKDIIISLD QRIQTLAYEE
patternXI     YGEDGAEVVL RDROGNIVDS LDSPRNKAPQ NGKDIIISLD QRIQTLAYEE
patternXII    YGEDGAEVVL RDROGNIVDS LDSPRNKAPQ NGKDIIISLD QRIQTLAYEE
patternXIII   YGEDGAEVVL RDROGNIVDS LDSPRNKAPQ NGKDIIISLD QRIQTLAYEE
patternXIV    YGEDGAEVVL RDROGNIVDS LDSPRNKAPQ NGKDIIISLD QRIQTLAYEE
patternXV     YGEDGAEVVL RDROGNIVDS LDSPRNKAPQ NGKDIIISLD QRIQTLAYEE
patternXVI    YGEDGAEVVL RDROGNIVDS LDSPRNKAPQ NGKDIIISLD QRIQTLAYEE
patternXVII   YGEDGAEVVL RDROGNIVDS LDSPRNKAPQ NGKDIIISLD QRIQTLAYEE
patternXVIII  YGEDGAEVVL RDROGNIVDS LDSPRNKAPQ NGKDIIISLD QRIQTLAYEE
patternXIX    YGEDGAEVVL RDROGNIVDS LDSPRNKAPQ NGKDIIISLD QRIQTLAYEE
patternXX     YGEDGAEVVL RDROGNIVDS LDSPRNKAPQ NGKDIIISLD QRIQTLAYEE
patternXXI    YGEDGAEVVL RDROGNIVDS LDSPRNKAPQ NGKDIIISLD QRIQTLAYEE
patternXXII   YGEDGAEVVL RDROGNIVDS LDSPRNKAPQ NGKDIIISLD QRIQTLAYEE
patternXXIII  YGEDGAEVVL RDROGNIVDS LDSPRNKAPQ NGKDIIISLD QRIQTLAYEE
patternXXIV   YGEDGAEVVL RDROGNIVDS LDSPRNKAPQ NGKDIIISLD QRIQTLAYEE
patternXXV    YGEDGAEVVL RDROGNIVDS LDSPRNKAPQ NGKDIIISLD QRIQTLAYEE
patternXXVI   YGEDGAEVVL RDROGNIVDS LDSPRNKAPQ NGKDIIISLD QRIQTLAYEE
patternXXVII  YGEDGAEVVL RDROGNIVDS LDSPRNKAPQ NGKDIIISLD QRIQTLAYEE
patternXXVIII YGEDGAEVVL RDROGNIVDS LDSPRNKAPQ NGKDIIISLD QRIQTLAYEE
patternXXIX   YGEDGAEVVL RDROGNIVDS LDSPRNKAPQ NGKDIIISLD QRIQTLAYEE
patternXXX_nM YGEDGAEVVL RDROGNIVDS LDSPRNKAPQ NGKDIIISLD QRIQTLAYEE
patternXXXIII YGEDGAEVVL RDROGNIVDS LDSPRNKAPQ NGKDIIISLD QRIQTLAYEE
patternXXXVII YGEDGAEVVL RDROGNIVDS LDSPRNKAPQ NGKDIIISLD QRIQTLAYEE
patternX      HAGEGAEVVL RDREGNIVDS LDSPRNKAPQ NGKDIIISLD QRIQTLAYEE
patternXXIII  YGEDGAEVVL RDROGNIVDS LDSPRNKAPQ NGKDIIISLD QRIQTLAYEE
patternXXX    HAGEGAEVVL RDREGNIVDS LDSPRNKAPQ NGKDIIISLD QRIQTLAYEE
patternXXXI   HAGEGAEVVL RDREGNIVDS LDSPRNKAPQ NGKDIIISLD QRIQTLAYEE
patternXXXII  HAGEGAEVVL RDREGNIVDS LDSPRNKAPQ NGKDIIISLD QRIQTLAYEE
patternXXXIII HAGEGAEVVL RDREGNIVDS LDSPRNKAPQ NGKDIIISLD QRIQTLAYEE
patternXXXIV  HAGEGAEVVL RDREGNIVDS LDSPRNKAPQ NGKDIIISLD QRIQTLAYEE
patternCII    HAGEGAEVVL RDREGNIVDS LDSPRNKAPQ NGKDIIISLD QRIQTLAYEE
patternCI     HAGEGAEVVL RDREGNIVDS LDSPRNKAPQ NGKDIIISLD QRIQTLAYEE
patternIIIg&Iva HAGEGAEVVL RDREGNIVDS LDSPRNKAPQ NGKDIIISLD QRIQTLAYEE
patternIIIh   HAGEGAEVVL RDREGNIVDS LDSPRNKAPQ NGKDIIISLD QRIQTLAYEE
patternXXXVI  YGEDGAEVVL RDROGNIVDS LDSPRNKAPQ NGKDIIISLD QRIQTLAYEE
patternXXXVIII HAGEGAEVVL RDROGNIVDS LDSPRNKAPK NGKDIIISLD QRIQTLAYEE
mosaic2      HAGEGAEVVL RDREGNIVDS LDSPRNKAPQ NGKDIIISLD QRIQTLAYEE
mosaic3      HAGEGAEVVL RDROGNIVDS LDSPRNKAPQ NGKDIIISLD QRIQTLAYEE
mosaic4      HGEDGAEVVL RDROGNIVDS LDSPRNKAPK NGKDIIISLD QRIQTLAYEE
NG-3        HAGEGAEVVL RDREGNIVDS LDSPRNKAPQ NGKDIIISLD QRIQTLAYEE
30/02      HAGEGAEVVL RDREGNIVDS LDSPRNKAPQ NGKDIIISLD QRIQTLAYEE
35/02      HAGEGAEVVL RDREGNIVDS LDSPRNKAPQ NGKDIIISLD QRIQTLAYEE
patternC     HAGEGAEVVL RDREGNIVDS LDSPRNKAPQ NGKDIIISLD QRIQTLAYEE
Consistency  7768***** **8***** *****9 *****9*****

```

|                 | 260        | 270        | 280        | 290        | 300        |
|-----------------|------------|------------|------------|------------|------------|
| wt              | LNKAVEYHQA | KAGTVVVLDA | RTGEILALAN | TPAYDPNRPG | RADSEQRRNR |
| patternI        | LNKAVEYHQA | KAGTVVVLDA | RTGEILALAN | TPAYDPNRPG | RADSEQRRNR |
| patternII       | LNKAVEYHQA | KAGTVVVLDA | RTGEILALAN | TPAYDPNRPG | RADSEQRRNR |
| patternIII      | LNKAVEYHQA | KAGTVVVLDA | RTGEILALAN | TPAYDPNRPG | RADSEQRRNR |
| patternIV       | LNKAVEYHQA | KAGTVVVLDA | RTGEILALAN | TPAYDPNRPG | RADSEQRRNR |
| patternV        | LNKAVEYHQA | KAGTVVVLDA | RTGEILALAN | TPAYDPNRPG | RADSEQRRNR |
| patternVI       | LNKAVEYHQA | KAGTVVVLDA | RTGEILALAN | TPAYDPNRPG | RADSEQRRNR |
| patternVII      | LNKAVEYHQA | KAGTVVVLDA | RTGEILALAN | TPAYDPNRPG | RADSEQRRNR |
| patternVIII     | LNKAVEYHQA | KAGTVVVLDA | RTGEILALAN | TPAYDPNRPG | RADSEQRRNR |
| patternIX       | LNKAVEYHQA | KAGTVVVLDA | RTGEILALAN | TPAYDPNRPG | RADSEQRRNR |
| patternXI       | LNKAVEYHQA | KAGTVVVLDA | RTGEILALAN | TPAYDPNRPG | RADSEQRRNR |
| patternXII      | LNKAVEYHQA | KAGTVVVLDA | RTGEILALAN | TPAYDPNRPG | RADSEQRRNR |
| patternXIII     | LNKAVEYHQA | KAGTVVVLDA | RTGEILALAN | TPAYDPNRPG | RADSEQRRNR |
| patternXIV      | LNKAVEYHQA | KAGTVVVLDA | RTGEILALAN | TPAYDPNRPG | RADSEQRRNR |
| patternXV       | LNKAVEYHQA | KAGTVVVLDA | RTGEILALAN | TPAYDPNRPG | RADSEQRRNR |
| patternXVI      | LNKAVEYHQA | KAGTVVVLDA | RTGEILALAN | TPAYDPNRPG | RADSEQRRNR |
| patternXVII     | LNKAVEYHQA | KAGTVVVLDA | RTGEILALAN | TPAYDPNRPG | RADSEQRRNR |
| patternXVIII    | LNKAVEYHQA | KAGTVVVLDA | RTGEILALAN | TPAYDPNRPG | RADSEQRRNR |
| patternXIX      | LNKAVEYHQA | KAGTVVVLDA | RTGEILALAN | TPAYDPNRPG | RADSEQRRNR |
| patternXX       | LNKAVEYHQA | KAGTVVVLDA | RTGEILALAN | TPAYDPNRPG | RADSEQRRNR |
| patternXXI      | LNKAVEYHQA | KAGTVVVLDA | RTGEILALAN | TPAYDPNRPG | RADSEQRRNR |
| patternXXII     | LNKAVEYHQA | KAGTVVVLDA | RTGEILALAN | TPAYDPNRPG | RADSEQRRNR |
| patternXXIV     | LNKAVEYHQA | KAGTVVVLDA | RTGEILALAN | TPAYDPNRPG | RADSEQRRNR |
| patternXXV      | LNKAVEYHQA | KAGTVVVLDA | RTGEILALAN | TPAYDPNRPG | RADSEQRRNR |
| patternXXVI     | LNKAVEYHQA | KAGTVVVLDA | RTGEILALAN | TPAYDPNRPG | RADSEQRRNR |
| patternXXVII    | LNKAVEYHQA | KAGTVVVLDA | RTGEILALAN | TPAYDPNRPG | RADSEQRRNR |
| patternXXVIII   | LNKAVEYHQA | KAGTVVVLDA | RTGEILALAN | TPAYDPNRPG | RADSEQRRNR |
| patternXXIX     | LNKAVEYHQA | KAGTVVVLDA | RTGEILALAN | TPAYDPNRPG | RADSEQRRNR |
| patternXXX_nM   | LNKAVEYHQA | KAGTVVVLDA | RTGEILALAN | TPAYDPNRPG | RADSEQRRNR |
| patternXXXIII   | LNKAVEYHQA | KTGTVVVLDA | RTGEILALAN | TPAYDPNRPG | RADSEQRRNR |
| patternXXXVII   | LNKAVEYHQA | KAGTVVVLDA | RTGEILALAN | TPAYDPNRPG | RADSEQRRNR |
| patternX        | LNKAVEYHQA | KAGTVVVLDA | RTGEILALVN | TPAYEPNKP  | QADSEQRRNR |
| patternXXIII    | LNKAVEYHQA | KAGTVVVLDA | RTGEILALVN | TPAYEPNKP  | QADSEQRRNR |
| patternXXX      | LNKAVEYHQA | KAGTVVVLDA | RTGEILALVN | TPAYEPNKP  | QADSEQRRNR |
| patternXXXI     | LNKAVEYHQA | KAGTVVVLDA | RTGEILALVN | TPAYEPNKP  | QADSEQRRNR |
| patternXXXII    | LNKAVEYHQA | KAGTVVVLDA | RTGEILALVN | TPAYEPNKP  | QADSEQRRNR |
| patternXXXIV    | LNKAVEYHQA | KAGTVVVLDA | RTGEILALVN | TPAYEPNKP  | QADSEQRRNR |
| patternCII      | LNKAVEYHQA | KAGTVVVLDA | RTGEILALVN | TPAYEPNKP  | QADSEQRRNR |
| patternCI       | LNKAVEYHQA | KAGTVVVLDA | RTGEILALVN | TPAYEPNKP  | QADSEQRRNR |
| patternIIIg&Iva | LNKAVEYHQA | KAGTVVVLDA | RTGEILALVN | TPAYEPNKP  | QADSEQRRNR |
| patternIIH      | LNKAVEYHQA | KAGTVVVLDA | RTGEILALVN | TPAYEPNKP  | QADSEQRRNR |
| patternXXXVI    | LNKAVEYHQA | KAGTVVVLDA | RTGEILALVN | TPAYEPNKP  | QADSEQRRNR |
| patternXXXVIII  | LNKAVEYHQA | KAGTVVVLDA | RTGEILALAN | TPAYDPNRPG | RADSEQRRNR |
| mosaic2         | LNKAVEYHQA | KAGTVVVLDA | RTGEILALVN | TPAYEPNKP  | QADSEQRRNR |
| mosaic3         | LNKAVEYHQA | KAGTVVVLDA | RTGEILALVN | TPAYEPNKP  | QADSEQRRNR |
| mosaic4         | LNKAVEYHQA | KAGTVVVLDA | RTGEILALAN | TPAYDPNRPG | RADSEQRRNR |
| NG-3            | LNKAVEYHQA | KAGTVVVLDA | RTGEILALVN | TPAYEPNKP  | QADSEQRRNR |
| 30/02           | LNKAVEYHQA | KAGTVVVLDA | RTGEILALVN | TPAYEPNKP  | QADSEQRRNR |
| 35/02           | LNKAVEYHQA | KAGTVVVLDA | RTGEILALVN | TPAYEPNKP  | QADSEQRRNR |
| patternC        | LNKAVEYHQA | KAGTVVVLDA | RTGEILALVN | TPAYEPNKP  | QADSEQRRNR |
| Consistency     | *****      | *9*****    | *****7*    | ****8**8** | 8*****     |

```

...|...|...|...|...|...|...|...|...|...|
          310      320      330      340      349
wt      AVTDMIEPGS AIKPFVIAKA LDAGKTDLNE RLNTQPYKIG PSPVR-DTHV
patternI AVTDMIEPGS AIKPFVIAKA LDAGKTDLNE RLNTQPYKIG PSPVRDDTHV
patternII AVTDMIEPGS AIKPFVIAKA LDAGKTDLNE RLNTQPYKIG PSPVRDDTHV
patternIII AVTDMIEPGS AIKPFVIAKA LDAGKTDLNE RLNTQPYKIG PSPVRDDTHV
patternIV AVTDMIEPGS AIKPFVIAKA LDAGKTDLNE RLNTQPYKIG PSPVRDDTHV
patternV AVTDMIEPGS AIKPFVIAKA LDAGKTDLNE RLNTQPYKIG PSPVRDDTHV
patternVI AVTDMIEPGS AIKPFVIAKA LDAGKTDLNE RLNTQPYKIG PSPVRDDTHV
patternVII AVTDMIEPGS AIKPFVIAKA LDAGKTDLNE RLNTQPYKIG PSPVRDDTHV
patternVIII AVTDMIEPGS AIKPFVIAKA LDAGKTDLNE RLNTQPYKIG PSPVRDDTHV
patternIX AVTDMIEPGS AIKPFVIAKA LDAGKTDLNE RLNTQPYKIG PSPVRDDTHV
patternXI AVTDMIEPGS AIKPFVIAKA LDAGKTDLNE RLNTQPYKIG PSPVRDDTHV
patternXII AVTDMIEPGS AIKPFVIAKA LDAGKTDLNE RLNTQPYKIG PSPVRDDTHV
patternXIII AVTDMIEPGS AIKPFVIAKA LDAGKTDLNE RLNTQPYKIG PSPVRDDTHV
patternXIV AVTDMIEPGS AIKPFVIAKA LDAGKTDLNE RLNTQPYKIG PSPVRDDTHV
patternXV AVTDMIEPGS AIKPFVIAKA LDAGKTDLNE RLNTQPYKIG PSPVR-DTHV
patternXVI AVTDMIEPGS AIKPFVIAKA LDAGKTDLNE RLNTQPYKIG PSPVRDDTHV
patternXVII AVTDMIEPGS AIKPFVIAKA LDAGKTDLNE RLNTQPYKIG PSPVRDDTHV
patternXVIII AVTDMIEPGS AIKPFVIAKA LDAGKTDLNE RLNTQPYKIG PSPVRDDTHV
patternXIX AVTDMIEPGS AIKPFVIAKA LDAGKTDLNE RLNTQPYKIG PSPVRDDTHV
patternXX AVTDMIEPGS AIKPFVIAKA LDAGKTDLNE RLNTQPYKIG PSPVRDDTHV
patternXXI AVTDMIEPGS AIKPFVIAKA LDAGKTDLNE RLNTQPYKIG PSPVRDDTHV
patternXXII AVTDMIEPGS AIKPFVIAKA LDAGKTDLNE RLNTQPYKIG PSPVRDDTHV
patternXXIV AVTDMIEPGS AIKPFVIAKA LDAGKTDLNE RLNTQPYKIG PSPVRDDTHV
patternXXV AVTDMIEPGS AIKPFVIAKA LDAGKTDLNE RLNTQPYKIG PSPVRDDTHV
patternXXVI AVTDMIEPGS AIKPFVIAKA LDAGKTDLNE RLNTQPYKIG PSPVRDDTHV
patternXXVII AVTDMIEPGS AIKPFVIAKA LDAGKTDLNE RLNTQPYKIG PSPVRDDTHV
patternXXVIII AVTDMIEPGS AIKPFVIAKA LDAGKTDLNE RLNTQPYKIG PSPVRDDTHV
patternXXX_nM AVTDMIEPGS AIKPFVIAKA LDAGKTDLNE RLNTQPYKIG PSPVRDDTHV
patternXXXIII AVTDMIEPGS AIKPFVIAKA LDAGKTDLNE RLNTQPYKIG PSPVRDDTHV
patternXXXVII AVTDMIEPGS AIKPFVIAKA LDAGKTDLNE RLNTQPYKIG PSPVRDDTHV
patternX AVTDMIEPGS AMKPFTIAKA LDSGKVDATD TFNTLPYKIG SATVQ-DTHV
patternXXIII AVTDMIEPGS AIKPFVIAKA LDAGKTDLNE RLNTQPYKIG PSPVRDDTHV
patternXXX AVTDMIEPGS AMKPFTIAKA LDSGKVDATD TFNTLPYKIG SATVQ-DTHV
patternXXXI AVTDMIEPGS AMKPFTIAKA LDSGKVDATD TFNTLPYKIG SATVQ-DTHV
patternXXXII AVTDMIEPGS AMKPFTIAKA LDSGKVDATD TFNTLPYKIG SATVQ-DTHV
patternXXXIV AVTDMIEPGS AMKPFTIAKA LDSGKVDATD TFNTLPYKIG SATVQ-DTHV
patternCII AVTDMIEPGS AMKPFTIAKA LDSGKVDATD TFNTLPYKIG SATVQ-DTHV
patternCI AVTDMIEPGS AMKPFTIAKA LDSGKVDATD TFNTLPYKIG SATVQ-DTHV
patternIIIg&Iva AVTDMIEPGS AMKPFTIAKA LDSGKVDATD TFNTLPYKIG SATVQ-DTHV
patternIIIh AVTDMIEPGS AMKPFTIAKA LDSGKVDATD TFNTLPYKIG SATVQ-DTHV
patternXXXVI AVTDMIEPGS AIKPFVIAKA LDAEKTNLNE RLNTQPYKIG PAQVR-DTHV
patternXXXVIII AVTDMIEPGS AMKPFTIAKA LDSGKVDATD TFNTLPYKIG PATVQ-DTHV
mosaic2 AVTDMIEPGS AMKPFTIAKA LDSGKVDATD TFNTLPYKIG SATVQ-DTHV
mosaic3 AVTDMIEPGS AMKPFTIAKA LDSGKVDATD TFNTLPYKIG SATVQ-DTHV
mosaic4 AVTDMIEPGS AMKPFTIAKA LDSGKVDATD TFNTLPYKIG SATVQ-DTHV
NG-3 AVTDMIEPGS AMKPFTIAKA LDSGKVDATD TFNTLPYKIG SATVQ-DTHV
30/02 AVTDMIEPGS AMKPFTIAKA LDSGKVDATD TFNTLPYKIG SATVQ-DTHV
35/02 AVTDMIEPGS AMKPFTIAKA LDSGKVDATD TFNTLPYKIG SATVQ-DTHV
patternC AVTDMIEPGS VMKPFVIAKA LDSGKVDTTD TFNTLPYKIG PATVQ-DTHV
Consistency ***** 98***7**** **89*79778 67**6***** 786*73****

```

|                  | 359        | 369        | 379         | 389        | 399         |
|------------------|------------|------------|-------------|------------|-------------|
| wt               | YPSLDVRGIM | QKSSNVGTSK | LSARFGAEEM  | YDFYHELIG  | VRMHSGFPPGE |
| patternI         | YPSLDVRGIM | QKSSNVGTSK | LSARFGAEEM  | YDFYHELIG  | VRMHSGFPPGE |
| patternII        | YPSLDVRGIM | QKSSNVGTSK | LSARFGAEEM  | YDFYHELIG  | VRMHSGFPPGE |
| patternIII       | YPSLDVRGIM | QKSSNVGTSK | LSARFGAEEM  | YDFYHELIG  | VRMHSGFPPGE |
| patternIV        | YPSLDVRGIM | QKSSNVGTSK | LSARFGAEEM  | YDFYHELIG  | VRMHSGFPPGE |
| patternV         | YPSLDVRGIM | QKSSNVGTSK | LSARFGAEEM  | YDFYHELIG  | VRMHSGFPPGE |
| patternVI        | YPSLDVRGIM | QKSSNVGTSK | LSARFGAEEM  | YDFYHELIG  | VRMHSGFPPGE |
| patternVII       | YPSLDVRGIM | QKSSNVGTSK | LSARFGAEEM  | YDFYHELIG  | VRMHSGFPPGE |
| patternVIII      | YPSLDVRGIM | QKSSNVGTSK | LSARFGAEEM  | YDFYHELIG  | VRMHSGFPPGE |
| patternIX        | YPSLDVRGIM | QKSSNVGTSK | LSARFGAEEM  | YDFYHELIG  | VRMHSGFPPGE |
| patternXI        | YPSLDVRGIM | QKSSNVGTSK | LSARFGAEEM  | YDFYHELIG  | VRMHSGFPPGE |
| patternXII       | YPSLDVRGIM | QKSSNVGTSK | LSARFGAEEM  | YDFYHELIG  | VRMHSGFPPGE |
| patternXIII      | YPSLDVRGIM | QKSSNVGTSK | LSARFGAEEM  | YDFYHELIG  | VRMHSGFPPGE |
| patternXIV       | YPSLDVRGIM | QKSSNVGTSK | LSARFGAEEM  | YDFYHELIG  | VRMHSGFPPGE |
| patternXV        | YPSLDVRGIM | QKSSNVGTSK | LSARFGAEEM  | YDFYHELIG  | VRMHSGFPPGE |
| patternXVI       | YPSLDVRGIM | QKSSNVGTSK | LSARFGAEEM  | YDFYHELIG  | VRMHSGFPPGE |
| patternXVII      | YPSLDVRGIM | QKSSNVGTSK | LSARFGAEEM  | YDFYHELIG  | VRMHSGFPPGE |
| patternXVIII     | YPSLDVRGIM | QKSSNVGTSK | LSARFGAEEM  | YDFYHELIG  | VRMHSGFPPGE |
| patternXIX       | YPSLDVRGIM | QKSSNVGTSK | LSARFGAEEM  | YDFYHELIG  | VRMHSGFPPGE |
| patternXX        | YPSLDVRGIM | QKSSNVGTSK | LSARFGAEEM  | YDFYHELIG  | VRMHSGFPPGE |
| patternXXI       | YPSLDVRGIM | QKSSNVGTSK | LSARFGAEEM  | YDFYHELIG  | VRMHSGFPPGE |
| patternXXII      | YPSLDVRGIM | QKSSNVGTSK | LSARFGAEEM  | YDFYHELIG  | VRMHSGFPPGE |
| patternXXIV      | YPSLDVRGIM | QKSSNVGTSK | LSARFGAEEM  | YDFYHELIG  | VRMHSGFPPGE |
| patternXXV       | YPSLDVRGIM | QKSSNVGTSK | LSARFGAEEM  | YDFYHELIG  | VRMHSGFPPGE |
| patternXXVI      | YPSLDVRGIM | QKSSNVGTSK | LSARFGAEEM  | YDFYHELIG  | VRMHSGFPPGE |
| patternXXVII     | YPSLDVRGIM | QKSSNVGTSK | LSARFGAEEM  | YDFYHELIG  | VRMHSGFPPGE |
| patternXXVIII    | YPSLDVRGIM | QKSSNVGTSK | LSARFGAEEM  | YDFYHELIG  | VRMHSGFPPGE |
| patternXXIX      | YPSLDVRGIM | QKSSNVGTSK | LSARFGAEEM  | YDFYHELIG  | VRMHSGFPPGE |
| patternXXX_nM    | YPSLDVRGIM | QKSSNVGTSK | LSARFGAEEM  | YDFYHELIG  | VRMHSGFPPGE |
| patternXXXIII    | YPSLDVRGIM | QKSSNVGTSK | LSARFGAEEM  | YDFYHELIG  | VRMHSGFPPGE |
| patternXXXVII    | YPSLDVRGIM | QKSSNVGTSK | LSARFGAEEM  | YDFYHELIG  | VRMHSGFPPGE |
| patternX         | YPTLDVRGIM | QKSSNVGTSK | LSAMFTPKEEM | YDFYHDLGVG | VRMHSGFPPGE |
| patternXXIII     | YPSLDVRGIM | QKSSNVGTSK | LSARFGAEEM  | YDFYHELIG  | VRMHSGFPPGE |
| patternXXX       | YPTLDVRGIM | QKSSNVGTSK | LSAMFTPKEEM | YDFYHDLGVG | VRMHSGFPPGE |
| patternXXXI      | YPTLDVRGIM | QKSSNVGTSK | LSAMFTPKEEM | YDFYHDLGVG | VRMHSGFPPGE |
| patternXXXII     | YPTLDVRGIM | QKSSNVGTSK | LSAMFTPKEEM | YDFYHDLGVG | VRMHSGFPPGE |
| patternXXXIV     | YPTLDVRGIM | QKSSNVGTSK | LSAMFTPKEEM | YDFYHDLGVG | VRMHSGFPPGE |
| patternCII       | YPTLDVRGIM | QKSSNVGTSK | LSAMFTPKEEM | YDFYHDLGVG | VRMHSGFPPGE |
| patternCI        | YPTLDVRGIM | QKSSNVGTSK | LSAMFTPKEEM | YDFYHDLGVG | VRMHSGFPPGE |
| patternII Ig&Iva | YPTLDVRGIM | QKSSNVGTSK | LSAMFTPKEEM | YDFYHDLGVG | VRMHSGFPPGE |
| patternIIIh      | YPTLDVRGIM | QKSSNVGTSK | LSAMFTPKEEM | YDFYHDLGVG | VRMHSGFPPGE |
| patternXXXVI     | YPSLDVRGIM | QKSSNVGTSK | LSARFSSKEM  | YDLYHSLGIG | VRMHSGFPPGE |
| patternXXXVIII   | YPTLDVRGIM | QKSSNVGTSK | LSAMFTPKEEM | YDFYHDLGVG | VRMHSGFPPGE |
| mosaic2          | YPTLDVRGIM | QKSSNVGTSK | LSAMFTPKEEM | YDFYHDLGVG | VRMHSGFPPGE |
| mosaic3          | YPTLDVRGIM | QKSSNVGTSK | LSAMFTPKEEM | YDFYHDLGVG | VRMHSGFPPGE |
| mosaic4          | YPTLDVRGIM | QKSSNVGTSK | LSAMFTPKEEM | YDFYHDLGVG | VRMHSGFPPGE |
| NG-3             | YPTLDVRGIM | QKSSNVGTSK | LSAMFTPKEEM | YDFYHDLGVG | VRMHSGFPPGE |
| 30/02            | YPTLDVRGIM | QKSSNVGTSK | LSAMFTPKEEM | YDFYHDLGVG | VRMHSGFPPGE |
| 35/02            | YPTLDVRGIM | QKSSNVGTSK | LSAMFTPKEEM | YDFYHDLGVG | VRMHSGFPPGE |
| patternC         | YPTLDVRGIM | QKSSNVGTSK | LSAMFTPKEEM | YDFYHDLGVG | VRMHSGFPPGE |
| Consistency      | **8*****   | *****      | ***6*667**  | **9**8**9* | *****       |



```

      ....|....| ....|....| ....|....| ....|....| ....|....|
      409      419      429      439      449
wt      TAGLLRNWRR WRPIEQATMS FGYGLQSL SLL QLARAYTALT HDGVLLPLSF
patternI TAGLLRNWRR WRPIEQATMS FGYGLQSL SLL QLARAYTALT HDGVLLPLSF
patternII TAGLLRNWRR WRPIEQATMS FGYGLQSL SLL QLARAYTALT HDGVLLPLSF
patternIII TAGLLRNWRR WRPIEQATMS FGYGLQSL SLL QLARAYTALT HDGVLLPLSF
patternIV TAGLLRNWRR WRPIEQATMS FGYGLQSL SLL QLARAYTALT HDGVLLPLSF
patternV TAGLLRNWRR WRPIEQATMS FGYGLQSL SLL QLARAYTALT HDGVLLPLSF
patternVI TAGLLRNWRR WRPIEQATMS FGYGLQSL SLL QLARAYTALT HDGVLLPLSF
patternVII TAGLLRNWRR WRPIEQATMS FGYGLQSL SLL QLARAYTALT HDGVLLPLSF
patternVIII TAGLLRNWRR WRPIEQATMS FGYGLQSL SLL QLARAYTALT HDGVLLPLSF
patternIX TAGLLRNWRR WRPIEQATMS FGYGLQSL SLL QLARAYTALT HDGVLLPLSF
patternXI TAGLLRNWRR WRPIEQATMS FGYGLQSL SLL QLARAYTALT HDGVLLPLSF
patternXII TAGLLRNWRR WRPIEQATMS FGYGLQSL SLL QLARAYTALT HDGVLLPLSF
patternXIII TAGLLRNWRR WRPIEQATMS FGYGLQSL SLL QLARAYTALT HDGVLLPLSF
patternXIV TAGLLRNWRR WRPIEQATMS FGYGLQSL SLL QLARAYTALT HDGVLLPLSF
patternXV TAGLLRNWRR WRPIEQATMS FGYGLQSL SLL QLARAYTALT HDGVLLPLSF
patternXVI TAGLLRNWRR WRPIEQATMS FGYGLQSL SLL QLARAYTALT HDGVLLPLSF
patternXVII TAGLLRNWRR WRPIEQATMS FGYGLQSL SLL QLARAYTALT HDGVLLPLSF
patternXVIII TAGLLRNWRR WRPIEQATMS FGYGLQSL SLL QLARAYTALT HDGVLLPLSF
patternXIX TAGLLRNWRR WRPIEQATMS FGYGLQSL SLL QLARAYTALT HDGVLLPLSF
patternXX TAGLLRNWRR WRPIEQATMS FGYGLQSL SLL QLARAYTALT HDGVLLPLSF
patternXXI TAGLLRNWRR WRPIEQATMS FGYGLQSL SLL QLARAYTALT HDGVLLPLSF
patternXXII TAGLLRNWRR WRPIEQATMS FGYGLQSL SLL QLARAYTALT HDGVLLPLSF
patternXXIII TAGLLRNWRR WRPIEQATMS FGYGLQSL SLL QLARAYTALT HDGVLLPLSF
patternXXIV TAGLLRNWRR WRPIEQATMS FGYGLQSL SLL QLARAYTALT HDGVLLPLSF
patternXXV TAGLLRNWRR WRPIEQATMS FGYGLQSL SLL QLARAYTALT HDGVLLPLSF
patternXXVI TAGLLRNWRR WRPIEQATMS FGYGLQSL SLL QLARAYTALT HDGVLLPLSF
patternXXVII TAGLLRNWRR WRPIEQATMS FGYGLQSL SLL QLARAYTALT HDGVLLPLSF
patternXXVIII TAGLLRNWRR WRPIEQATMS FGYGLQSL SLL QLARAYTALT HDGVLLPLSF
patternXXIX TAGLLRNWRR WRPIEQATMS FGYGLQSL SLL QLARAYTALT HDGVLLPLSF
patternXXX_nM TAGLLRNWRR WRPIEQATMS FGYGLQSL SLL QLARAYTALT HDGVLLPLSF
patternXXXIII TAGLLRNWRR WRPIEQATMS FGYGLQSL SLL QLARAYTALT HDGVLLPLSF
patternXXXVII TAGLLRNWRR WRPIEQATMS FGYGLQSL SLL QLARAYTALT HDGVLLPLSF
patternX TAGLLRSWRR WQKIEQATMS FGYGLQSL SLL QLARAYTVLT HDGELLPVSF
patternXXIII TAGLLRNWRR WRPIEQATMS FGYGLQSL SLL QLARAYTVLT HDGELLPVSF
patternXXX TAGLLRSWRR WQKIEQATMS FGYGLQSL SLL QLARAYTVLT HDGELLPVSF
patternXXXI TAGLLRSWRR WQKIEQATMS FGYGLQSL SLL QLARAYTVLT HDGELLPVSF
patternXXXII TAGLLRSWRR WQKIEQATMS FGYGLQSL SLL QLARAYTVLT HDGELLPVSF
patternXXXIII TAGLLRSWRR WQKIEQATMS FGYGLQSL SLL QLARAYTVLT HDGELLPVSF
patternXXXIV TAGLLRSWRR WQKIEQATMS FGYGLQSL SLL QLARAYTVLT HDGELLPVSF
patternCII TAGLLRSWRR WQKIEQATMS FGYGLQSL SLL QLARAYTVLT HDGELLPVSF
patternCI TAGLLRSWRR WQKIEQATMS FGYGLQSL SLL QLARAYTVLT HDGELLPVSF
patternIIIg&Iva TAGLLRSWRR WQKIEQATMS FGYGLQSL SLL QLARAYTVLT HDGELLPVSF
patternIIIh TAGLLRSWRR WQKIEQATMS FGYGLQSL SLL QLARAYTVLT HDGELLPVSF
patternXXXVI SAGVLRNWRK WRPIEQATMS FGYGLQSL SLL QLARAYTVLT HDGVLLPVSF
patternXXXVIII TAGLLRNWRR WRPIEQATMS FGYGLQSL SLL QLARAYTALT HDGVLLPVSF
mosaic2 TAGLLRSWRR WQKIEQATMS FGYGLQSL SLL QLARAYTVLT HDGELLPVSF
mosaic3 TAGLLRSWRR WQKIEQATMS FGYGLQSL SLL QLARAYTVLT HDGELLPVSF
mosaic4 TAGLLRSWRR WQKIEQATMS FGYGLQSL SLL QLARAYTVLT HDGELLPVSF
NG-3 TAGLLRSWRR WQKIEQATMS FGYGLQSL SLL QLARAYTVLT HDGELLPVSF
30/02 TAGLLRSWRR WQKIEQATMS FGYGLQSL SLL QLARAYTVLT HDGELLPVSF
35/02 TAGLLRSWRR WQKIEQATMS FGYGLQSL SLL QLARAYTVLT HDGELLPVSF
patternC SAGVLRNWRK WRPIEQATMS FGYGLQSL SLL QLARAYTVLT HDGELLPVSF
Consistency 9**9**8**9 *87***** *****7** ***6***8**

```

|                  | 459      | 469        | 479      | 488        | 498      |            |
|------------------|----------|------------|----------|------------|----------|------------|
| wt               | EKQAVAPQ | GK RIFKE   | STARE VR | NLMVSVTE   | PGGTGTAG | - VDGFDVGA |
| patternI         | EKQAVAPQ | GK RIFKE   | STARE VR | NLMVSVTE   | PGGTGTAG | - VDGFDVGA |
| patternII        | EKQAVAPQ | GK RIFKE   | STARE VR | NLMVSVTE   | PGGTGTAG | - VDGFDVGA |
| patternIII       | EKQAVAPQ | GK RIFKE   | STARE VR | NLMVSVTE   | PGGTGTAG | - VDGFDVGA |
| patternIV        | EKQAVAPQ | GK RIFKE   | STARE VR | NLMVSVTE   | PGGTGTAG | - VDGFDVGA |
| patternV         | EKQAVAPQ | GK RIFKE   | STARE VR | NLMVSVTE   | PGGTGTAG | - VDGFDVGA |
| patternVI        | EKQAVAPQ | GK RIFKE   | STARE VR | NLMVSVTE   | PGGTGTAG | - VDGFDVGA |
| patternVII       | EKQAVAPQ | GK RIFKE   | STARE VR | NLMVSVTE   | PGGTGTAG | - VDGFDVGA |
| patternVIII      | EKQAVAPQ | GK RIFKE   | STARE VR | NLMVSVTE   | PGGTGTAG | - VDGFDVGA |
| patternIX        | EKQAVAPQ | GK RIFKE   | STARE VR | NLMVSVTE   | PGGTGTAG | - VDGFDVGA |
| patternXI        | EKQAVAPQ | GK RIFKE   | STARE VR | NLMVSVTE   | PGGTGTAG | - VDGFDVGA |
| patternXII       | EKQAVAPQ | GK RIFKE   | STARE VR | NLMVSVTE   | PGGTGTAG | - VDGFDVGA |
| patternXIII      | EKQAVAPQ | GK RIFKE   | STARE VR | NLMVSVTE   | PGGTGTAG | - VDGFDVGA |
| patternXIV       | EKQAVAPQ | GK RIFKE   | STARE VR | NLMVSVTE   | PGGTGTAG | - VDGFDVGA |
| patternXV        | EKQAVAPQ | GK RIFKE   | STARE VR | NLMVSVTE   | PGGTGTAG | - VDGFDVGA |
| patternXVI       | EKQAVAPQ | GK RIFKE   | STARE VR | NLMVSVTE   | PGGTGTAG | - VDGFDVGA |
| patternXVII      | EKQAVAPQ | GK RIFKE   | STARE VR | NLMVSVTE   | PGGTGTAG | - VDGFDVGA |
| patternXVIII     | EKQAVAPQ | GK RIFKE   | STARE VR | NLMVSVTE   | PGGTGTAG | - VDGFDVGA |
| patternXIX       | EKQAVAPQ | GK RIFKE   | STARE VR | NLMVSVTE   | PGGTGTAG | - VDGFDVGA |
| patternXX        | EKQAVAPQ | GK RIFKE   | STARE VR | NLMVSVTE   | PGGTGTAG | - VDGFDVGA |
| patternXXI       | EKQAVAPQ | GK RIFKE   | STARE VR | NLMVSVTE   | PGGTGTAG | - VDGFDVGA |
| patternXXII      | EKQAVAPQ | GK RIFKE   | STARE VR | NLMVSVTE   | PGGTGTAG | - VDGFDVGA |
| patternXXIV      | EKQAVAPQ | GK RIFKE   | STARE VR | NLMVSVTE   | PGGTGTAG | - VDGFDVGA |
| patternXXV       | EKQAVAPQ | GK RIFKE   | STARE VR | NLMVSVTE   | PGGTGTAG | - VDGFDVGA |
| patternXXVI      | EKQAVAPQ | GK RIFKE   | STARE VR | NLMVSVTE   | PGGTGTAG | - VDGFDVGA |
| patternXXVII     | EKQAVAPQ | GK RIFKE   | STARE VR | NLMVSVTE   | PGGTGTAG | - VDGFDVGA |
| patternXXVIII    | EKQAVAPQ | GK RIFKE   | STARE VR | NLMVSVTE   | PGGTGTAG | - VDGFDVGA |
| patternXXX_nM    | EKQAVAPQ | GK RIFKE   | STARE VR | NLMVSVTE   | PGGTGTAG | - VDGFDVGA |
| patternXXXIII    | EKQAVAPQ | GK RIFKE   | STARE VR | NLMVSVTE   | PGGTGTAG | - VDGFDVGA |
| patternXXXVII    | EKQAVAPQ | GK RIFKE   | STARE VR | NLMVSVTE   | PGGTGTAG | - VDGFDVGA |
| patternX         | EKQAVAPK | GK RVIKAS  | TAKK VR  | ELMVSVTE   | AGGTGTAG | - VDGFDVGA |
| patternXXIII     | EKQAVAPK | GK RVIKAS  | TAKK VR  | ELMVSVTE   | AGGTGTAG | - VDGFDVGA |
| patternXXX       | EKQAVAPK | GK RVIKAS  | TAKK VR  | ELMVSVTE   | AGGTGTAG | - VDGFDVGA |
| patternXXXI      | EKQAVAPK | GK RVIKAS  | TAKK VR  | ELMVSVTE   | AGGTGTAG | - VDGFDVGA |
| patternXXXII     | EKQAVAPK | GK RVIKAS  | TAKK VR  | ELMVSVTE   | AGGTGTAG | - VDGFDVGA |
| patternXXXIV     | EKQAVAPK | GK RVIKAS  | TAKK VR  | ELMVSVTE   | AGGTGTAG | - VDGFDVGA |
| patternCII       | EKQAVAPK | GK RVIKAS  | TAKK VR  | ELMVSVTE   | AGGTGTAG | - VDGFDVGA |
| patternCI        | EKQAVAPK | GK RVIKAS  | TAKK VR  | ELMVSVTE   | AGGTGTAG | - VDGFDVGA |
| patternII Ig&Iva | EKQAVAPK | GK RVIKAS  | TAKK VR  | ELMVSVTE   | AGGTGTAG | - VDGFDVGA |
| patternIIIh      | EKQAVAPK | GK RVIKAS  | TAKK VR  | ELMVSVTE   | AGGTGTAG | - VDGFDVGA |
| patternXXXVI     | EKQAVAPK | GK RVIKAS  | TAKK VR  | ELMVSVTE   | AGGTGTAG | - VDGFDVGA |
| patternXXXVIII   | EKQAVAPQ | GK RIFKE   | STARE VR | NLMVSVTE   | PGGTGTAG | - VDGFDVGA |
| mosaic2          | EKQAVAPK | GK RVIKAS  | TAKK VR  | ELMVSVTE   | AGGTGTAG | - VDGFDVGA |
| mosaic3          | EKQAVAPK | GK RVIKAS  | TAKK VR  | ELMVSVTE   | AGGTGTAG | - VDGFDVGA |
| mosaic4          | EKQAVAPK | GK RVIKAS  | TAKK VR  | ELMVSVTE   | AGGTGTAG | - VDGFDVGA |
| NG-3             | EKQAVAPK | GK RVIKAS  | TAKK VR  | ELMVSVTE   | AGGTGTAG | - VDGFDVGA |
| 30/02            | EKQAVAPK | GK RVIKAS  | TAKK VR  | ELMVSVTE   | AGGTGTAG | - VDGFDVGA |
| 35/02            | EKQAVAPK | GK RVIKAS  | TAKK VR  | ELMVSVTE   | AGGTGTAG | - VDGFDVGA |
| patternC         | EKQAVAPK | GK RVIKAS  | TAKK VR  | ELMVSVTE   | AGGSGLAG | - VDGFDVGA |
| Consistency      | *****7** | *97*69**87 | **7***** | 6**9*9***0 | *****    |            |

```

      ....|....| ....|....| ....|....| ....|....| ....|....|
      508      518      528      538      548
wt      GTARKEVNGR YADNKHVATF IGFAPAKNPR VIVAVTIDEP TAHGYYGQGVV
patternI      GTARKEVNGR YADNKHVATF IGFAPAKNPR VIVAVTIDEP TAHGYYGQGVV
patternII     GTARKLVNGR YVDNKHVGTG IGFAPAKNPR VIVAVTIDEP TAHGYYGQGVV
patternIII    GTARKLVNGR YVDNKHVGTG IGFAPAKNPR VIVAVTIDEP TAHGYYGQGVV
patternIV     GTARKLVNGR YVDNKHVGTG IGFAPAKNPR VIVAVTIDEP TAHSYYGGVV
patternV      GTARKLVNGR YVDNKHVGTG IGFAPAKNPR VIVAVTIDEP TAHSYYGGVV
patternVI     GTARKLVNGR YVDNKHVATF IGFAPAKNPR VIVAVTIDEP TAHGYYGQGVV
patternVII    GTVRKLVNGR YVDNKHVATF IGFAPAKNPR VIVAVTIDEP TAHSYYGGVV
patternVIII   GTVRKLVNGR YVDNKHVATF IGFAPAKNPR VIVAVTIDEP TAHSYYGGVV
patternIX     GTARKLVNGR YVDNKHVGTG IGFAPAKNPR VIVAVTIDEP TAHGYYGQGVV
patternXI     GTVRKLVNGR YVDNKHVGTG IGFAPAKNPR VIVAVTIDEP TAHGYYGQGVV
patternXII    GTARKLVNGR YVDNKHVGTG IGFAPAKNPR VIVAVTIDEP TAHGYYGQGVV
patternXIII   GTVRKLVNGR YVDNKHVGTG IGFAPAKNPR VIVAVTIDEP TAHGYYGQGVV
patternXIV    GTARKLVNGR YVDNKHVGTG IGFAPAKNPR VIVAVTIDEP TANGYYGGVV
patternXV     GTARKEVNGR YADNKHVATF IGFAPAKNPR VIVAVTIDEP TANGYYGGVV
patternXVI    GTARKLVNGR YVDNKHVGTG IGFAPAKNPR VIVAVTIDEP TAHGYYGQGVV
patternXVII   GTVRKLVNGR YVDNKHVGTG IGFAPAKNPR VIVAVTIDEP TAHSYYGGVV
patternXVIII  GTTRKLVNGR YVDNKHVGTG IGFAPAKNPR VIVAVTIDEP TAHSYYGGVV
patternXIX    GTARKLVNGR YVDNKHVGTG IGFAPAKNPR VIVAVTIDEP TANGYYGGVV
patternXX     GTARKLVNGR YVDNKHVGTG IGFAPAKNPR VIVAVTIDEP TANGYYGGVV
patternXXI    GTVRKLVNGR YVDNKHVATF IGFAPAKNPR VIVAVTIDEP TANGYYGGVV
patternXXII   GTARKLVNGR YVDNKHVGTG IGFAPAKNPR VIVAVTIDEP TANGYYGGVV
patternXXIII  GTARKLVNGR YVDNKHVGTG IGFAPAKNPR VIVAVTIDEP TAHSYYGGVV
patternXXIV   GTARKLVNGR YVDNKHVGTG IGFAPAKNPR VIVAVTIDEP TAHSYYGGVV
patternXXV    GTTRKLVNGR YVDNKHVGTG IGFAPAKNPR VIVAVTIDEP TAHSYYGGVV
patternXXVI   GTVRKLVNGR YVDNKHVGTG IGFAPAKNPR VIVAVTIDEP TAHSYYGGVV
patternXXVII  GTVRKLVNGR YVDNKHVGTG IGFAPAKNPR VIVAVTIDEP TAHGYYGQGVV
patternXXVIII GTVRKLVNGR YVDNKHVGTG IGFAPAKNPR VIVAVTIDEP TAHGYYGQGVV
patternXXIX   GTVRKLVNGR YVDNKHVGTG IGFAPAKNPR VIVAVTIDEP TAYGYGGVV
patternXXX_nM GTTRKLVNGR YVDNKHVGTG IGFAPAKNPR VIVAVTIDEP TAHSYYGGVV
patternXXXIII GTVRKLVNGR YVDNKHVGTG IGFAPAKNPR VIVAVTIDEP TAHSYYGGVV
patternXXXVII GTARKLVNGR YVDNKHVGTG IGFAPAKNPR VIVAVTIDEP TAHGYYGQGVV
patternX      GTARKLVNGR YVDYKHVATF IGFAPAKNPR VIVAVTIDEP TANGYYSGVV
patternXXIII  GTARKLVNGR YVDYKHVATF IGFAPAKNPR VIVAVTIDEP TANGYYSGVV
patternXXX    GTVRKLVNGR YVDYKHVATF IGFAPAKNPR VIVAVTIDEP TANGYYSGVV
patternXXXI   GTARKLVNGR YVDYKHVATF IGFAPAKNPR VIVAVTIDEP TANGYYSGVV
patternXXXII  GTARKLVNGR YVDYKHVATF IGFAPAKNPR VIVAVTIDEP TANGYYSGVV
patternXXXIII GTARKLVNGR YVDYKHVATF IGFAPAKNPR VIVAVTIDEP TANGYYSGVV
patternXXXIV  GTARKLVNGR YVDYKHVATF IGFAPAKNPR VIVAVTIDEP TANGYYSGVV
patternCII    GTARKEVNGR YVDYKHVATF IGFAPAKNPR VIVAVTIDEP TANGYYSGVV
patternCI     GTPRKLVNGR YVDYKHVATF IGFAPAKNPR VIVAVTIDEP TANGYYSGVV
patternIIIg&Iva GTARKLVNGR YVDYKHVATF IGFAPAKNPR VIVAVTIDEP TANGYYSGVV
patternIIUh   GTARKLVNGR YVDYKHVATF IGFAPAKNPR VIVAVTIDEP TANGYYSGVV
patternXXXVI  GTARKLVNGR YVDNKHVATF IGFAPAKNPR VIVAVTIDEP TANGYYGGVV
patternXXXVIII GTARKEVNGR YADNKHVATF IGFAPAKNPR VIVAVTIDEP TAHGYYGQGVV
mosaic2      GTARKLVNGR YVDYKHVATF IGFAPAKNPR VIVAVTIDEP TANGYYSGVV
mosaic3      GTARKLVNGR YVDYKHVATF IGFAPAKNPR VIVAVTIDEP TANGYYSGVV
mosaic4      GTVRKLVNGR YVDNKHVATF IGFAPAKNPR VIVAVTIDEP TANGYYGGVV
NG-3        GTARKLVNGR YVDYKHVATF IGFAPAKNPR VIVAVTIDEP TANGYYSGVV
30/02       GTARKLVNGR YVDYKHVATF IGFAPAKNPR VIVAVTIDEP TANGYYSGVV
35/02       GTARKLVNGR YVDYKHVATF IGFAPAKNPR VIVAVTIDEP TANGYYSGVV
patternC     GTARKLVNGR YVDYKHVATF IGFAPAKNPR VIVAVTIDEP TANGYYSGVV
Consistency  **7**9**** *9*6**97** ***** **9*9**** **78**7***

```



```

      ....|....| ....|....| ....|....| ....
      558      568      577  581
wt      AGPPFKKIMG  GSLNILGISP  TKPLT-AAAV  KTPS
patternI      AGPPFKKIMG  GSLNILGISP  TKPLT-AAAV  KTPS
patternII     AGPPFKKIMG  GSLNILGISP  TKPLT-AAAV  KTPS
patternIII    AGPPFKKIMG  GSLNILGVSP  TKPLTNVA AV  KTPS
patternIV     AGPPFKKIMG  GSLNILGISP  TKPLT-AAAV  KTPS
patternV      AGPPFKKIMG  GSLNILGVSP  TKPLTNVA AV  KTPS
patternVI     AGLPFKKIMG  GSLNILGISP  TKPLT-AAAV  KTPS
patternVII    AGPPFKKIMG  GSLNILGISP  TKPLT-AAAV  KTPS
patternVIII   AGLPFKKIMG  GSLNILGISP  TKPLT-AAAV  KTPS
patternIX     AGLPFKKIMG  GSLNILGISP  TKPLT-AAAV  KTPS
patternXI     AGLPFKKIMG  GSLNILGISP  TKPLT-AAAV  KTPS
patternXII    AGSPFKKIMG  GSLNILGISP  TKPLT-AAAV  KTPS
patternXIII   AGSPFKKIMG  GSLNILGISP  TKPLT-AAAV  KTPS
patternXIV    AGPPFKKIMG  GSLNILGISP  TKPLT-AAAV  KTPS
patternXV     AGPPFKKIMG  GSLNILGISP  TKPLT-AAAV  KTPS
patternXVI    AGPPFKKIMG  GSLNILGISP  TKPLTNVA AV  KTPS
patternXVII   AGPPFKKIMG  GSLNILGVSP  TKPLTNVA AV  KTPS
patternXVIII  AGPPFKKIMG  GSLNILGVSP  TKPLTNVA AV  KTPS
patternXIX    AGPPFKKIMG  GSLNILGVSP  TKPLTNVA AV  KTPS
patternXX     AGPPFKKIMG  GSLNILGVSP  TKPLTNVA AV  KTPS
patternXXI    AGPVFKQVMG  GSLNILGVSP  TKPLTNVA AV  KTPS
patternXXII   AGPVFKQVMG  GSLNILGVSP  TKPLTNVA AV  KTPS
patternXXIII  AGSPFKKIMG  GSLNILGVSP  TKPLTNVA AV  KTPS
patternXXIV   AGPPFKKIMG  GSLNILGISP  TKPLT-AAAV  KTPS
patternXXV    AGPPFKKIMG  GSLNILGISP  TKPLT-AAAV  KTPS
patternXXVI   AGSPFKKIMG  GSLNILGVSP  TKPLT-AAAV  KTPS
patternXXVII  AGPPFKKIMG  GSLNILGISP  TKPLT-AAAV  KTPS
patternXXVIII AGPPFKKIMG  GSLNILGVSP  TKPLT-AAAV  KTPS
patternXXIX   AGPPFKKIMG  GSLNILGISP  TKPLT-AAAV  KTPS
patternXXX_nM AGPPFKKIMG  GSLNVLGISP  TKPLT-AAAV  KTPS
patternXXXIII AGPPFKKIMG  GSLNILGISP  TKPLT-AAAV  KTPS
patternXXXVII AGSPFKKIMG  GSLNILGISP  TKPLT-AAAV  KTPS
patternX      TGPVFKQVMG  GSLNILGVSP  TKPLTNVA AV  KTPS
patternXXIII  TGPVFKLVMG  GSLNILGVSP  TKPLTNVA AV  KTPS
patternXXX    TGPVFKQVMG  GSLNILGVSP  TKPLTNVA AV  KTPS
patternXXXI   TGPVFKQVMG  GSLNILGVSP  TKPLTNVA AV  KTPS
patternXXXII  AGLPFKKIMG  GSLNILGISP  TKPLT-AAAV  KTPS
patternXXXIII AGPPFKKIMG  GSLNILGISP  TKPLT-AAAV  KTPS
patternXXXIV  AGPPFKKIMG  GSLNILGISP  TKPLT-AAAV  KTPS
patternCII    AGPPFKKIMG  GSLNILGISP  TKPLT-AAAV  KTPS
patternCI     AGPPFKKIMG  GSLNILGISP  TKPLT-AAAV  KTPS
patternIIIg&Iva AGPPFKKIMG  GSLNILGISP  TKPLT-AAAV  KTPS
patternIIIfh  TGPVFKKIMG  GSLNILGISP  TKPLT-AAAV  KTPS
patternXXXVI  TGPVFKQVMG  GSLNILGVSP  TKPLTNVA AV  KTPS
patternXXXVIII AGPPFKKIMG  GSLNILGISP  TKPLT-AAAV  KTPS
mosaic2      TGPVFKQVMG  GSLNILGVSP  TKPLTNVA AV  KTPS
mosaic3      TGPVFKQVMG  GSLNILGVSP  TKPLTNVA AV  KTPS
mosaic4      TGPVFKQVMG  GSLNILGVSP  TKPLTNVA AV  KTPS
NG-3        TGPVFKQVMG  GSLNILGVSP  TKPLTNVA AV  KTPS
30/02       TGPVFKQVMG  GSLNILGVSP  TKPLTNVA AV  KTPS
35/02       TGPVFKQVMG  GSLNILGVSP  TKPLTNVA AV  KTPS
patternC     TGPVFKQVMG  GSLNILGVSP  TKPLTNVA AV  KTPS
Consistency  7*76**79**  ****9**9**  *****17***  ****

```
